# Supplementary material for: Lifestyle and work ability in a general working population in Norway: a cross-sectional study
Source: PubMed Central journal article supplement — BMJ Open. 2019 Apr 3;9(4):e026215. doi: 10.1136/bmjopen-2018-026215 (PMC6500250; doi:10.1136/bmjopen-2018-026215), 2019-04-03
Supplement: bmjopen-2018-026215.draft_revisions.pdf [file bmjopen-2018-026215.draft_revisions.pdf]

# BMJ Open

BMJ Open is committed to open peer review. As part of this commitment we make the peer review history of every article we publish publicly available.

When an article is published we post the peer reviewers' comments and the authors' responses online. We also post the versions of the paper that were used during peer review. These are the versions that the peer review comments apply to.

The versions of the paper that follow are the versions that were submitted during the peer review process. They are not the versions of record or the final published versions. They should not be cited or distributed as the published version of this manuscript.

BMJ Open is an open access journal and the full, final, typeset and author-corrected version of record of the manuscript is available on our site with no access controls, subscription charges or pay-per-view fees (<http://bmjopen.bmj.com>).

If you have any questions on BMJ Open's open peer review process please email [info.bmjopen@bmj.com](mailto:info.bmjopen@bmj.com)

# BMJ Open

## Lifestyle and work ability in a general working population in Norway – a cross-sectional study

|                               |                                                                                                                                                                                                                                                                                                                                                                                                |
|-------------------------------|------------------------------------------------------------------------------------------------------------------------------------------------------------------------------------------------------------------------------------------------------------------------------------------------------------------------------------------------------------------------------------------------|
| Journal:                      | <i>BMJ Open</i>                                                                                                                                                                                                                                                                                                                                                                                |
| Manuscript ID                 | bmjopen-2018-026215                                                                                                                                                                                                                                                                                                                                                                            |
| Article Type:                 | Research                                                                                                                                                                                                                                                                                                                                                                                       |
| Date Submitted by the Author: | 13-Sep-2018                                                                                                                                                                                                                                                                                                                                                                                    |
| Complete List of Authors:     | Oellingrath, Inger; University of South-Eastern Norway, Department of Nursing and Health Sciences<br>De Bortoli, Marit; University of South-Eastern Norway, Department of Nursing and Health Sciences<br>Svendsen, Martin ; Sykehuset Telemark HF, Department of Occupational and Environmental Medicine<br>Fell, Anne Kristin; Sykehuset Telemark HF, Occupational and environmental Medicine |
| Keywords:                     | Lifestyle risk factors, Work ability, General working population                                                                                                                                                                                                                                                                                                                               |
|                               |                                                                                                                                                                                                                                                                                                                                                                                                |

SCHOLARONE™  
Manuscripts

Peer Review Only

1  
2  
3 Lifestyle and work ability in a general working population in Norway – a  
4 cross-sectional study  
5  
6  
7

8 Inger M. Oellingrath. Department of Nursing and Health Sciences. Faculty of Health- and  
9 Social Sciences. University of South-Eastern Norway. E-mail: [inger.m.oellingrath@usn.no](mailto:inger.m.oellingrath@usn.no)

10  
11  
12 Marit Müller De Bortoli. Kjølnes ring 56, 3918 Porsgrunn, Norway. Department of Nursing  
13 and Health Sciences. Faculty of Health- and Social Sciences. University of South-Eastern  
14 Norway. E-mail: [marit.muller@usn.no](mailto:marit.muller@usn.no). Telephone: +47 92626790 \*).

15  
16  
17 Martin Veel Svendsen. Department of Occupational and Environmental Medicine. Telemark  
18 Hospital, Skien, Norway. E-mail: [martin.svendsen@sthf.no](mailto:martin.svendsen@sthf.no)

19  
20  
21 Anne Kristin Møller Fell. Department of Occupational and Environmental Medicine.  
22 Telemark Hospital, Skien, Norway. E-mail: [annfel@sthf.no](mailto:annfel@sthf.no)

23  
24  
25  
26  
27 \*) Corresponding author  
28  
29

30  
31 Word count: 4133  
32  
33  
34  
35  
36  
37  
38  
39  
40  
41  
42  
43  
44  
45  
46  
47  
48  
49  
50  
51  
52  
53  
54  
55  
56  
57  
58  
59  
60

## ABSTRACT

**Objectives:** The aim of this study was to investigate the association between multiple lifestyle-related risk factors (unhealthy diet, low leisure-time physical activity, overweight/obesity and smoking) and self-rated work ability in a general working population

**Setting:** Population-based cross-sectional study, in Telemark County, Norway, 2013.

**Participants:** A random sample of 50000 subjects were invited to answer a self-administered questionnaire, and 16099 responded. Complete data on lifestyle and work ability were obtained for 10355 participants aged 18- 50 years all engaged in paid work during the preceding 12 months.

**Outcome measure:** Work ability was assessed using the Work Ability Score (WAS) – the first question in the Work Ability Index (WAI). To study potential dose-response of lifestyle risk factors on work ability, a lifestyle risk index was constructed. Associations between lifestyle factors/index and work ability were examined using multiple logistic regression analysis.

**Results:** Decreased work ability was more likely among subjects with an unhealthy diet ( $OR_{adj}$  1.3, 95% CI 1.02 to 1.5), inactive persons ( $OR_{adj}$  1.4, 95% CI 1.2 to 1.6), obese respondents ( $OR_{adj}$  1.5, 95% CI 1.3 to 1.7), and former and current smokers ( $OR_{adj}$  1.2, 95% CI 1.1 to 1.4 and 1.3, 95% CI 1.2 to 1.5, respectively). A cumulative (dose-response) association was observed between the lifestyle risk index and the likelihood of decreased work ability (moderate risk score:  $OR_{adj}$ =1.3; CI 1.1 to 1.6; high risk score:  $OR_{adj}$ = 1.9; CI 1.6 to 2.2; very high risk score:  $OR_{adj}$ =2.4; CI 1.9 to 3.0). Population attributable risk (PAR) of decreased work ability was 38%. All associations were observed independently of gender, age, education level and occupation.

**Conclusions:** Lifestyle risk factors were associated with decreased work ability. A cumulative (dose-response) relationship was observed. The findings are considered relevant to occupational intervention programmes aimed at prevention and improvement of decreased work ability.

**Key words:** Lifestyle risk factors, work ability, general working population

## Strengths and limitations of this study

- The study included 10355 subjects from the general working population in Telemark, Norway.
- Inclusion of several lifestyle-related factors allowed for examination of both independent and dose-response associations between lifestyle and work ability.
- The study is strengthened by inclusion of several adjustment variables/possible confounders (age, gender, educational level and occupation) in the regression analyses.
- Potential study limitations are selection bias due to non-response, the cross sectional design, lifestyle and weight self-reports and nonattendance of older than 50.

## BACKGROUND

As in many other European countries (1), Norway's population and workforce are aging. The challenges this presents have given rise to government policies with stronger emphasis on work ability promotion and extension of working life. Work ability is a multifactorial concept encompassing the worker's health status, physical capacity and psychological resources (2) and may be defined as the balance between the self-perceived physical and mental capacity and work demands (2, 3).

Promoting and maintaining good work ability in all phases of working life is vital, as poor work ability has been linked with increased risk of reduced work quality (4), sickness absence (5-7), long-term disability (7, 8), early retirement (5, 9) and long-term unemployment (7). A person's work ability may be influenced by various work-related and individual factors (10, 11). At the individual level, lifestyle-related factors (such as diet, physical activity, BMI and smoking) are known to have a significant impact on health (12, 13). However, the contribution of lifestyle to variation in work ability is not fully understood. The most commonly used method for assessing self-rated work ability is the Work Ability Index (WAI), developed by researchers of the Finnish Institute of Occupational Health (14). A corresponding instrument is the first single-item question in the WAI, the Work Ability Score (WAS) (15).

Previous cross-sectional and longitudinal studies have investigated the relationship between different lifestyle factors and work ability (measured by WAI or WAS) (10, 11, 16-23). A systematic review covering 14 cross-sectional and six longitudinal studies of lifestyle and work ability published from 1985 to 2006 has identified low leisure-time physical activity and obesity as important determinants of decreased work ability in different occupational groups (10). Recent studies support these findings (11, 16-22, 24). A limited number of studies have indicated a positive association between healthy diet indicators (high intake of fibre/fruits and vegetables) and good work ability (10, 23, 24). Non-smoking has also been associated with good work ability in some studies (6, 10, 18), although the results on smoking and work ability remain inconclusive (10, 16). Previous studies have commonly focused on distinct occupational groups, groups with certain job demands, and selected age groups (10, 11, 16-19, 22, 24), rather than on general working populations (20, 21, 23). Additional studies assessing large general working populations are warranted to investigate whether lifestyle changes could enhance work ability across occupations and ages.

1  
2  
3 Lifestyle-related risk factors are often observed together (25). Previous lifestyle and health  
4 studies have shown cumulative (dose-response) effects of lifestyle risk indicators on non-  
5 communicable, chronic diseases and all-cause mortality (26), self-rated health (27, 28) and  
6 long-term work disability (early retirement) (8). However, few studies have focused on  
7 associations between multifactorial lifestyle risk and work ability. It appears that only one  
8 small (n=187) Polish study conducted among professionally active subjects has investigated  
9 the dose-response effect of multiple, simultaneously applicable lifestyle indicators on  
10 modification of work ability. In that study, the authors identified a cumulative association  
11 between a healthy lifestyle index (incorporating recommended physical activity, normal BMI,  
12 non-smoking and fibre intake) and increasing WAI (23). Given the lack of larger studies  
13 exploring multifactorial associations between lifestyle and work ability, supplementary  
14 studies are needed. Available Norwegian studies have mainly investigated the effect of  
15 psychosocial, social and mechanical work exposure on work ability (29), rather than the  
16 potential contribution of lifestyle factors.  
17  
18  
19  
20  
21  
22  
23  
24

25  
26 The aim of the present study was to investigate the association between multiple lifestyle-  
27 related risk factors (unhealthy diet, low leisure-time physical activity, obesity and smoking)  
28 and self-rated work ability in a large general population of employed adults in Norway.  
29  
30  
31  
32

## 33 METHODS

### 34 **Study population and design**

35  
36 The cross-sectional “Telemark Study” was carried out from February to August 2013 in  
37 Telemark County, which is located in the south-eastern part of Norway and has a population  
38 of about 170000. A sample of 50000 males and females aged 16 to 50 years, from the  
39 approximately 80000 residents in Telemark, was drawn randomly using the services of the  
40 Norwegian national population registry. Of the 50000 who received the questionnaire, 1793  
41 had moved, four were deceased, 13 were unable to answer due to disease or disability, 23  
42 could not answer due to language problems and 25 were ineligible for other reasons. Of the  
43 48142 eligible participants, a total of 16099 answered the questionnaire, resulting in a  
44 response rate of 33%. The data collection and recruitment methods and characteristics of the  
45 non-responders have been described in detail elsewhere (30).  
46  
47  
48  
49  
50  
51  
52  
53

54 Participants were asked questions on diet, physical activity, height and weight, and  
55 background variables at baseline. Employees were defined as subjects engaged in paid work  
56  
57  
58  
59  
60

1  
2  
3 during the preceding 12 months. Participants aged 16–17 years were excluded from the study  
4 due to low work engagement in this group. Complete data for the present analyses (diet,  
5 physical activity, smoking habits, height and weight and work ability) were available for  
6 10355 participants.  
7  
8

### 9 10 **Work ability**

11 Self-rated work ability was assessed using the first single-item question in the WAI (14), the  
12 Work Ability Score (WAS) (15): “Current work ability compared with the lifetime best”,  
13 where a score of 0 represents complete work disability and a score of 10 represents work  
14 ability at its best. Previous studies have demonstrated a strong association between WAS and  
15 the complete WAI (9, 20). WAS has been recommended and used as a simple, reliable  
16 indicator of work ability in several population studies (5, 9, 16, 20, 31). In this study, work  
17 ability was divided into two categories: decreased work ability (score 0–7) and good work  
18 ability (score 8–10) (19, 31).  
19  
20  
21  
22  
23  
24

### 25 **Diet**

26 Diet was determined using food frequency questions previously used in the Norwegian  
27 population-based Nord-Trøndelag Health Study (HUNT3) (2006–2008) (32, 33). The  
28 questions were selected from a larger validated food frequency questionnaire used in the Oslo  
29 Health Study of 2001 (HUBRO) (34) and covered habitual intake of fruits/berries, vegetables,  
30 boiled potatoes, pasta/rice, fat fish, sausages/hamburgers and chocolate/candies, with the  
31 response options “0–3 times/month”, “1–3 times/week”, “4–6 times/week”, “1 time/day”, and  
32 “≥2 times/day”. To reflect general dietary advice for improved health (35), the following  
33 indicators and cut-off points were used: intake of fruits/berries and vegetables (≥2 times/day),  
34 fat fish (1–3 times/week) and sausages/hamburgers and chocolate/candies (≤ 1–3 times/week).  
35 The responses were coded 0 (not meeting general dietary recommendations), or 1 (meeting  
36 general dietary recommendations). A diet sum score for each participant (scale 0–4) was  
37 calculated by summarising their scores for the four indicators, reflecting the number of  
38 recommendations met (36). The diet score was trichotomised into the categories “unhealthy”  
39 (0–1), “average” (2) and “healthy” (3–4) diet.  
40  
41  
42  
43  
44  
45  
46  
47  
48  
49

### 50 **Physical activity**

51 Moderate to vigorous leisure-time physical activity (MVPA) was assessed using questions  
52 covering frequency, intensity and duration of exercise used in the HUNT1 (1984–1986) and  
53 HUNT3 (2006–2008) studies (37). The questionnaire has previously been validated against  
54  
55  
56  
57  
58  
59  
60

1  
2  
3 objective measurement methods and the International Physical Activity Questionnaire  
4 (IPAQ), with good internal consistency (37). The participants reported average weekly  
5 frequency of exercise by answering the question, “How frequently do you exercise?”, which  
6 had the following answer options: “never”, “less than once a week”, “once a week”, “2–3  
7 times a week” and “almost every day (4–7 times a week)”. Average intensity was reported by  
8 answering the question, “If you exercise once or more a week, how hard do you exercise?”,  
9 which had the following answer options: “I do not become sweaty or breathless”, “I become  
10 sweaty or breathless” and “I become almost exhausted”. Average duration was reported by  
11 answering the question, “For how long are you normally physically active?”, which had the  
12 following answer options: “less than 15 minutes”, “15–29 minutes”, “30 min–1 hour” and  
13 “more than 1 hour”. To reflect recommendations on adult MVPA ( $\geq 150$  minutes/week) (35),  
14 the responses to the three questions were combined to give a total MVPA score (37). This was  
15 labelled “Physical activity” and dichotomised into “active” and “inactive”. The weighted  
16 scores used to calculate the total score and the cut-off point reflecting recommended MVPA  
17 were set according to the values used in the HUNT1 and HUNT3 studies (37, 38).

### 27 **BMI categories**

28  
29 BMI categories (underweight, normal weight, overweight, obesity) were calculated based on  
30 self-reported height and weight data. Cut-off points were chosen according to the World  
31 Health Organization reference values for adults: underweight ( $<18.5$ ), normal weight (18.5–  
32 24.9), overweight (25–29.9) and obese ( $\geq 30$ ) (39).

### 36 **Smoking**

37  
38 Smoking was measured by asking three questions. The first was, “Do you smoke every day?”  
39 Two follow-up questions were then asked: “Do you smoke occasionally?” and “If not, have  
40 you smoked in the past?” Smoking habits were divided into three categories labelled “current  
41 smoker” (every day and occasional smoking combined), “former smoker” and “never  
42 smoked”.

### 47 **Lifestyle risk index**

48  
49 An overall lifestyle risk index was constructed to study the possible cumulative (dose-  
50 response) effect of lifestyle risk factors on work ability. To calculate relative health risk, the  
51 individual lifestyle factors were given weighted risk scores – 0 (low health risk), 0.5  
52 (intermediate health risk) and 1 (high health risk) – and then summed into an overall index  
53 ranging from 0 to 4 (Table 1). To study different levels of lifestyle risk, the lifestyle risk index  
54  
55  
56  
57  
58  
59

was divided into four categories: “low risk score” (total score 0–0.5), “moderate risk score” (total score 1–1.5), “high risk score” (total score 2–2.5) and “very high risk score” (total score 3–4). The index was labelled “Lifestyle risk index”.

### **Adjustment variables**

#### *Age:*

The participants were all between 18 and 50 years of age, and were grouped into three categories: “18–30 years”, “31–40 years” and “41–50 years”.

#### *Educational level:*

The participants’ educational level was categorised as follows: “primary and lower secondary education” (10 years or less), “upper secondary education” (an additional three to four years), and “university or university college”.

#### *Occupational group:*

The participants were classified by a trained research assistant based on self-reported current occupation (2013), using the International Standard Classification of Occupations (ISCO-88) coding system (40). The ten occupational groups were further combined into five subgroups for use in the analyses (Table 1).

### **Statistical analysis**

Multiple logistic regression analysis was used to assess associations between the four individual lifestyle factors and the multifactorial lifestyle risk index (independent variables), as well as the likelihood of decreased work ability (dependent variable). The individual lifestyle variables were mutually adjusted in the respective models. Odds ratios (OR) with 95% confidence intervals were calculated for the likelihood of decreased work ability. Forward conditional selection was applied to include available adjustment variables (gender, age, educational level and occupational group) associated with the respective independent variables in the models. The population-based attributable risk (PAR) of decreased work ability was calculated (41). PAR is defined as the reduction in incidence that would be observed if the population were entirely unexposed, compared with its actual exposure pattern.

Only participants with complete data for all main variables (lifestyle variables and WAS) were included in the analyses. Respondents with missing values for adjustment variables were included with “missing” as a separate adjustment variable category. For all tests,  $P < 0.05$  was

1  
2  
3 considered significant. The questionnaires were scanned by Eyes and Hands (Read-soft  
4 Forms, Helsingborg, Sweden), while the statistical analyses were carried out using IBM SPSS  
5 Statistics for Windows, version 23.  
6  
7  
8  
9

### 10 **Patient and Public Involvement**

11  
12 To release the full potential of the study we have involved user-representatives in the study  
13 planning, design and transfer of knowledge. Resourceful user representatives are engaged in  
14 the dissemination of results to the public, policy makers and to health care workers through  
15 regional, national and international media on all platforms (newspapers, internet, radio and  
16 television). An user-representative is member of the steering committee and has given  
17 valuable contributions in development of questionnaires. In addition user representatives are  
18 involved in piloting the questionnaire.  
19  
20  
21  
22  
23  
24  
25

## 26 **RESULTS**

27  
28 A total of 16099 of the 48142 eligible subjects answered the questionnaire. Of these, 12932  
29 had been employed during the preceding 12 months and were aged 18 or older. Complete data  
30 on lifestyle variables and work ability were obtained for 10355 respondents. Further  
31 background characteristics of the study population are shown in Table 1. The distributions of  
32 the main variables are specified in Table 2.  
33  
34  
35  
36  
37  
38  
39  
40  
41  
42  
43  
44  
45  
46  
47  
48  
49  
50  
51  
52  
53  
54  
55  
56  
57  
58  
59  
60

Table 1 Study population characteristics (n = 10355).

| Population characteristics                                                                         | N (%)       |
|----------------------------------------------------------------------------------------------------|-------------|
| <b>Gender</b>                                                                                      |             |
| Males                                                                                              | 4774 (46.1) |
| Females                                                                                            | 5581 (53.9) |
| <b>Age group</b>                                                                                   |             |
| 18–30                                                                                              | 2708 (26.2) |
| 31–40                                                                                              | 2964 (28.6) |
| 41–50                                                                                              | 4683 (45.2) |
| <b>Educational level</b>                                                                           |             |
| Primary school and lower secondary education (10 years or less)                                    | 1018 (9.8)  |
| Upper secondary education (an additional three to four years)                                      | 4242 (41.0) |
| University or university college                                                                   | 4794 (46.3) |
| Missing                                                                                            | 301 (2.9)   |
| <b>Occupational group</b>                                                                          |             |
| Legislators, senior officials and managers and professionals and armed forces (groups 0–I–II only) | 2674 (25.8) |
| Technicians and associated professionals (group III)                                               | 2646 (25.6) |
| Clerks and service workers and shop and market sales workers (groups IV–V)                         | 1383 (13.4) |
| Skilled agriculture and fishery workers and craft and related trade workers (groups VI–VII)        | 1219 (11.8) |
| Plant and machine operators and assemblers and elementary occupations (groups VIII–IX)             | 1024 (9.9)  |
| Missing                                                                                            | 1409 (13.6) |

Table 2 Study population, distribution of main variables (n=10355).

|                                   | Total<br>(n=10,355)<br>n (%) | Lifestyle index<br>risk score* |
|-----------------------------------|------------------------------|--------------------------------|
| <b>Diet</b>                       |                              |                                |
| Healthy                           | 5851 (56.5)                  | (0)                            |
| Average                           | 3700 (35.7)                  | (0.5)                          |
| Unhealthy                         | 804 (7.8)                    | (1)                            |
| <b>Physical activity (PA)</b>     |                              |                                |
| Active                            | 5332 (51.5)                  | (0)                            |
| Inactive                          | 5023 (48.5)                  | (1)                            |
| <b>BMI category</b>               |                              |                                |
| Normal weight                     | 4951 (47.8)                  | (0)                            |
| Underweight (<18,5)               | 128 (1.2)                    | (0.5)                          |
| Overweight (25–30)                | 3733 (36.1)                  | (0.5)                          |
| Obese (>30)                       | 1543 (14.9)                  | (1)                            |
| <b>Smoking status</b>             |                              |                                |
| Never smoked                      | 5555 (53.6)                  | (0)                            |
| Former smoker                     | 2298 (22.2)                  | (0.5)                          |
| Current smoker                    | 2502 (24.2)                  | (1)                            |
| <b>Lifestyle index risk score</b> |                              |                                |
| Low risk score                    | 2592 (25.0)                  | (0–0.5)                        |
| Moderate risk score               | 4030 (38.9)                  | (1–1.5)                        |
| High risk score                   | 2895 (28.0)                  | (2–2.5)                        |
| Very high risk score              | 838 (8.1)                    | (3–4)                          |
| <b>Work ability score</b>         |                              |                                |
| Decreased work ability (0–7)      | 1379 (13.3)                  |                                |
| Normal/good work ability (8–10)   | 8976 (86.7)                  |                                |

\* The numbers in brackets are the risk scores used for each variable when calculating the lifestyle index.

Table 3 Associations between lifestyle factors and likelihood of decreased work ability (n=10,355)

| Model 1                     | OR <sub>crude</sub>    | OR <sub>adj1</sub> *  | OR <sub>adj2</sub> **  |
|-----------------------------|------------------------|-----------------------|------------------------|
| Diet                        |                        |                       |                        |
| Healthy (ref.)              | 1.0                    | 1.0                   | 1.0                    |
| Average                     | <b>1.2 (1.03, 1.3)</b> | 1.1 (0.98, 1.3)       | 1.1 (0.98, 1.3)        |
| Unhealthy                   | <b>1.4 (1.2, 1.7)</b>  | <b>1.3 (1.1, 1.6)</b> | <b>1.3 (1.02, 1.5)</b> |
| Physical activity (PA)      |                        |                       |                        |
| Active (ref.)               | 1.0                    | 1.0                   | 1.0                    |
| Inactive                    | <b>1.6 (1.4, 1.8)</b>  | <b>1.4 (1.3, 1.6)</b> | <b>1.4 (1.2, 1.6)</b>  |
| BMI                         |                        |                       |                        |
| Normal weight (ref.)        | 1.0                    | 1.0                   | 1.0                    |
| Underweight (BMI <18.5)     | 1.5 (0.91, 2.4)        | 1.4 (0.86, 2.2)       | 1.3 (0.82, 2.2)        |
| Overweight (BMI 25–30)      | <b>1.2 (1.01, 1.3)</b> | 1.1 (0.97, 1.3)       | 1.1 (0.97, 1.3)        |
| Obese (BMI >30)             | <b>1.6 (1.4, 1.9)</b>  | <b>1.5 (1.3, 1.8)</b> | <b>1.5 (1.3, 1.7)</b>  |
| Smoking status              |                        |                       |                        |
| Never smoked (ref.)         | 1.0                    | 1.0                   | 1.0                    |
| Former smoker               | <b>1.4 (1.2, 1.6)</b>  | <b>1.4 (1.2, 1.6)</b> | <b>1.2 (1.1, 1.4)</b>  |
| Current smoker              | <b>1.6 (1.4, 1.9)</b>  | <b>1.5 (1.3, 1.8)</b> | <b>1.3 (1.2, 1.5)</b>  |
| Model 2***                  | OR <sub>crude</sub>    | OR <sub>adj2</sub> ** |                        |
| Lifestyle risk index        |                        |                       |                        |
| Low risk score (0–0.5)      | 1.0                    | 1.0                   |                        |
| Moderate risk score (1–1.5) | <b>1.4 (1.2, 1.7)</b>  | <b>1.3 (1.1, 1.6)</b> |                        |
| High risk score (2–2.5)     | <b>2.2 (1.8, 2.5)</b>  | <b>1.9 (1.6, 2.2)</b> |                        |
| Very high risk score (3–4)  | <b>2.8 (2.3, 3.5)</b>  | <b>2.4 (1.9, 3.0)</b> |                        |

\* Adjusted for other lifestyle factors.

\*\* Adjusted for other lifestyle factors, gender, age, educational level and occupational group.

\*\*\* Population-based attributable risk (PAR) for reduced WA based on lifestyle risk index: 38%.

1  
2  
3  
4  
5 Multiple logistic regression showed independent associations between individual lifestyle  
6 factors and the likelihood of decreased work ability (Table 3, Model 1). Participants in the  
7 category “unhealthy diet” were more likely to have decreased work ability than participants  
8 with a “healthy diet” ( $OR_{adj2}=1.3$ ; CI 1.02 to 1.5). Inactive subjects were more likely to have  
9 decreased work ability than active individuals ( $OR_{adj2}= 1.4$ ; CI 1.2 to 1.6). Obese participants  
10 had lower work ability than normal-weight subjects ( $OR_{adj2}= 1.5$ ; CI 1.3 to 1.7). Former and  
11 current smokers were more likely to have decreased work ability than those who had never  
12 smoked ( $OR_{adj2}= 1.2$ ; CI 1.1 to 1.4, and adjusted  $OR_{adj2}= 1.3$ ; CI 1.2 to 1.5, respectively). All  
13 associations were observed independently of other lifestyle factors and available background  
14 variables (gender, age, educational level and occupational group).  
15  
16  
17  
18  
19  
20

21 A cumulative (dose-response) effect was observed between the lifestyle risk index and the  
22 likelihood of decreased work ability (Table 3, Model 2). The figures were as follows:  
23 moderate risk score:  $OR_{adj2}=1.3$ ; CI 1.1 to 1.6; high risk score:  $OR_{adj2}= 1.9$ ; CI 1.6 to 2.2; very  
24 high risk score:  $OR_{adj2}=2.4$ ; CI 1.9 to 3.0. The analyses were adjusted for available  
25 background variables. PAR of decreased work ability based on the overall risk scores was  
26 38%.  
27  
28  
29  
30  
31  
32  
33  
34  
35  
36  
37  
38  
39  
40  
41  
42  
43  
44  
45  
46  
47  
48  
49  
50  
51  
52  
53  
54  
55  
56  
57  
58  
59  
60

## DISCUSSION

In the present study, consistent associations were found between several lifestyle risk factors and self-rated work ability in a general working population in Norway. Obesity was the factor which was most strongly associated with decreased work ability, followed by low physical activity, current smoking and unhealthy diet/former smoking. Further, a cumulative (dose-response) effect was observed between risk factors and work ability. Increasing scores on a multiple lifestyle risk index were associated with increasing likelihood of decreased work ability. A PAR of 38% indicated a substantial contribution of lifestyle to work ability. All associations were observed independently of gender, age, educational level and occupation.

A direct comparison with other studies is difficult, due to heterogeneity of study design, definition and measurement of lifestyle indicators, varying population sizes and varying use of complete WAI or WAS. However, some similarities and differences can be noted.

The results agree with previous studies in which unhealthy diet indicators were linked with decreased work ability (10, 23, 24). Unhealthy diet, characterised by low consumption of healthy foods or nutrients, has previously been associated with low mental and physical health in a number of population studies (42-46). Work ability has previously been strongly associated with mental and physical health (16). One possible explanation for the findings is that an unhealthy diet may influence self-perceived work ability through decreased physical and mental capacity related to job demands (2). Currently, little information is available on how measures to promote healthy eating at the workplace can have positive impact in this context. However, the results indicate that a diet close to the recommended composition could improve work ability.

There is convincing evidence that regular physical activity helps to prevent various chronic diseases and improve health-related quality of life (47-49). It is therefore likely that physically active individuals are better equipped to meet physical and psychological demands at work, and to achieve better work ability. In accordance with previous occupation-specific studies (10, 16-19, 23, 24), low leisure-time physical activity was associated with decreased work ability in the present sample from the general working population. Earlier studies indicate that the benefits of and need for physical activity differ between job types. A recently published Danish study focusing on workers performing physically demanding tasks concluded that physical activity must be of high intensity and long duration to increase work ability (22). In contrast, it has also been suggested that mentally demanding jobs do not necessarily require

1  
2  
3 good physical condition to meet work demands, at least not among younger workers (16). A  
4 Swedish prospective study of healthcare workers found that leisure-time physical activity at  
5 the recommended level or higher improved work ability both immediately and in the longer  
6 term (17). Correspondingly, the results in the present study show that achieving the  
7 recommended level of weekly leisure time MVPA reduces the likelihood of decreased work  
8 ability, indicating a beneficial effect across occupations and ages. Further, recent research  
9 indicates that physical activity at the workplace may have an additional favourable impact on  
10 work ability due to positive effects on social relationships and psychological wellbeing (50).

11  
12  
13  
14  
15  
16 In line with previous studies (10, 16, 18, 19, 23, 24), a significant association was observed  
17 between obesity and decreased work ability. Obese respondents had a 50% higher likelihood  
18 of decreased work ability than respondents with a normal weight. In a systematic review  
19 published in 2009, five out of seven studies (mainly concentrating on Finnish municipal  
20 workers and caregivers) reported an association between obesity and low work ability in  
21 different occupational groups (10). A recent Danish study of a general working population of  
22 10000 adults has shown that increasing BMI above normal range is associated with lower  
23 work ability (21). A similar trend was observed in the present study, with the likelihood of  
24 decreased work ability increasing gradually as BMI rises. However, the results for the  
25 overweight respondents did not reach significance in the adjusted models. There are several  
26 possible explanations for the observed association, ranging from individual health problems  
27 due to obesity to psychosocial problems and physical limitations at the workplace (51).

28  
29  
30  
31  
32  
33  
34  
35  
36 Smokers (both current and former) showed a higher likelihood of decreased work ability than  
37 non-smokers. However, there is no unanimous agreement on this association. While some  
38 studies have failed to demonstrate a significant difference (16, 20, 24), other studies support  
39 our findings (18, 19, 23). A Dutch study of workers with common diseases found significance  
40 only for participants with respiratory diseases (19), while another study found significance for  
41 women only (23). In contrast, the effect of occasional smoking on work ability has been  
42 found to be more evident for men than for women (52). Contradictory findings may be  
43 explained by the fact that earlier studies have examined different occupational groups, not the  
44 general working population. A possible explanation for the observed association is impaired  
45 health status or chronic conditions due to current or former smoking, which in turn may have  
46 impaired work ability (52). The results indicate that former smokers may also be at risk of  
47 decreased work ability, emphasising the importance of assessing this group as well.

1  
2  
3 As suggested by others (23), a dose-response effect was observed between lifestyle risk  
4 factors and work ability. Participants with a high or very high risk score on the lifestyle risk  
5 index were more than twice as likely to have decreased work ability than those with a low risk  
6 score. The effect seems to be cumulative rather than synergetic as the strength of the  
7 associations of more than one risk factor was not stronger than the sum of the risks of the  
8 underlying factors (19). Moreover, additional analyses of the most prevalent risk-factor  
9 combinations did not show any significant synergetic effects either (data not shown).

14 A PAR of 38% indicates a substantial contribution of multiple lifestyle risk to decreased work  
15 ability. According to the lifestyle risk index, a considerable proportion (36%) of the  
16 participants had a high or very high risk score. Knowing that an unhealthy lifestyle increases  
17 the risk of various non-communicable diseases, it can be assumed that lifestyle changes in  
18 line with current health recommendations would improve the prognoses of these diseases and  
19 indirectly improve work ability.

24 Although no causality can be claimed based on the present results, the associations indicate  
25 that occupational health promotion strategies should target multiple lifestyle changes to  
26 reduce the likelihood of decreased work ability. Lifestyle is theoretically modifiable, but often  
27 considered a personal matter with no formal responsibility resting with the employer.  
28 However, facilitating lifestyle changes through workplace measures may be beneficial for  
29 both employers and employees in terms of improved work ability.

34 The present study has strengths, but also limitations that should be recognised. An important  
35 strength is the large study sample, which covers all types of occupational groups and a broad  
36 age range. Simultaneous assessment of several lifestyle-related factors has allowed mutual  
37 adjustment and examination of both independent and dose-response effects. Further, the study  
38 has employed validated questions for diet (53), leisure time MVPA (37) and self-assessed  
39 work ability (9, 20). The dichotomisation of the total MVPA score into “active” and  
40 “inactive” gives good information on MVPA by reference to current recommendations on  
41 physical activity (35, 37, 38). The dietary score appears to be a comprehensive indicator of  
42 healthy dietary behaviour, compared to previous studies in which the “diet” variable was  
43 either not fully elucidated (24) or consisted only of single nutrients or single food items (10,  
44 23). The first single-item question of the WAI, the WAS (15) – “Current work ability  
45 compared with lifetime best” – was used to assess work ability. This item has become  
46 established as a practical, simple and valid indicator of work ability (9, 20), often replacing  
47  
48  
49  
50  
51  
52  
53  
54  
55  
56  
57  
58  
59

1  
2  
3 complete WAI in clinical practice and research (54, 55) and increasingly used in population  
4 studies (5, 9, 16, 20, 31).  
5

6 Several individual and environmental factors have previously been associated with decreased  
7 work ability and/or lifestyle (10, 16, 56-58). To investigate independent relationships between  
8 lifestyle and work ability, several adjustment variables (age, gender, educational level and  
9 occupation) were included in the regression analyses. However, the adjustment did not alter  
10 the estimates substantially. Nevertheless, the possibility cannot be excluded that other  
11 individual and environmental characteristics such as poor musculoskeletal capacity, chronic  
12 disease, psychosocial factors at work and high physical or mental work demands may have  
13 attenuated the associations (10, 16, 19, 29, 57).  
14  
15  
16  
17  
18

19 The present study did not include workers older than 50 years of age. Therefore, it cannot be  
20 concluded that the findings are generalizable to older age groups. Previous research has  
21 indicated that lifestyle may be even more important to older workers than younger in terms of  
22 good work ability (10, 16). Moreover, promoting good work ability through a healthy lifestyle  
23 early on may reduce the risk of non-communicable chronic diseases and consequent impaired  
24 work ability later in life (13, 56).  
25  
26  
27  
28  
29

30 Participants' self-reported diet and PA data may have caused bias due to under-reporting of  
31 unhealthy habits and/or over-reporting of healthy habits, or bias due to deficient recollection.  
32 However, the applied questions on food items and PA have demonstrated good reliability and  
33 validity when compared with objective measures and other validated questionnaires (37, 53).  
34 Self-reported weight and height is known to be prone to bias, and misreporting may have  
35 influenced the observed associations. Nevertheless, the proportion of participants in the  
36 overweight and obese categories was in line with national BMI data for adults (59). As  
37 regards to self-reported smoking history, previous studies have indicated high reliability of  
38 self-reporting (60). In addition, occasional smokers were included in the current smoker  
39 category to capture all at-risk respondents, as infrequent and occasional smokers may still  
40 have a nicotine dependency and may underreport (61).  
41  
42  
43  
44  
45  
46  
47

48 Another limitation of the study is the low response rate (33%), which may have caused bias  
49 due to non-response (30). There was a predominance of participants from older age groups  
50 and women. Further, only participants with complete data on lifestyle indicators and work  
51 ability were analysed. However, non-response to the postal questionnaire has been assessed  
52 (30), showing that responders and non-responders had similar frequencies of respiratory  
53  
54  
55  
56  
57  
58  
59

1  
2  
3 symptoms and asthma, but that young males and past smokers were somewhat  
4 underrepresented and that weighting according to inverse probability of non-response did not  
5 alter the results substantially (data not shown).  
6  
7

8 Data collection was limited to one Norwegian county, and the results are therefore not  
9 necessarily representative of the national population. Finally, the study's cross-sectional  
10 design makes it impossible to identify causal relationships between lifestyle indicators and  
11 work ability.  
12  
13  
14  
15

## 16 17 CONCLUSION

18  
19 In the present study, significant associations have been identified between several lifestyle  
20 risk factors and decreased work ability in a general working population. Moreover, a dose-  
21 response effect of multiple lifestyle risk factors on decreased work ability has been observed.  
22 The results indicate that employees in general may benefit from interventions targeting  
23 multiple lifestyle changes. Further, the results appear relevant to occupational intervention  
24 programmes aimed at preventing and improving decreased work ability. A follow-up study is  
25 planned to investigate the observed associations over time, with a particular focus on workers  
26 with diagnosed chronic diseases.  
27  
28  
29  
30  
31  
32  
33  
34  
35  
36  
37  
38  
39  
40  
41  
42  
43  
44  
45  
46  
47  
48  
49  
50  
51  
52  
53  
54  
55  
56  
57  
58  
59  
60

## Footnotes

## List of abbreviations

WAI: work ability index; WAS: work ability score; MVPA: moderate to vigorous physical activity; PAR: population based attributable risk.

## Declarations

### *Authors' contribution*

AKMF and MVS were involved in the conception, design and data collection. IMO was involved in selection of research questions and planning of the statistical analyses. MVS was responsible for the statistical analyses. All authors were involved in the interpretation of the results. IMO drafted the manuscript with the assistance from MMDB. All authors revised the manuscript critically and approved the final manuscript.

### *Funding*

The research was supported by funding from University of South-Eastern Norway and Telemark Hospital.

### *Competing interests*

The authors declare that they have no competing interest.

### *Ethics approval*

The study was conducted in accordance with the guidelines laid down in the Declaration of Helsinki, and were approved by the Regional Committee for Ethics in Medical Research and the Norwegian Data Protection Authority (REC 2012/1665).

**Acknowledgements** The authors thank Regine Abrahamsen, Geir Klepaker and Gølin Finkenhagen Gundersen for data collection. The authors are grateful to Professor Johny Kongerud for contribution to the design of the main study.

### *Consent for publication*

Not applicable.

### *Availability of data and materials*

The datasets generated and/or analysed during the current study are not publicly available due to individual privacy regulations, but are available from the corresponding author on reasonable request

## References

1. Ilmarinen J. Ageing workers in Finland and in the European Union: Their situation and the promotion of their working ability, employability and employment. *Geneva Papers on Risk and Insurance-Issues and Practice*. 2001;26(4):623-41.
2. Tuomi K, Ilmarinen J, Seitsamo J, Huuhtanen P, Martikainen R, Nygard CH, et al. Summary of the Finnish research project (1981-1992) to promote the health and work ability of aging workers. *Scand J Work Environ Health*. 1997;23 Suppl 1:66-71.
3. Ilmarinen J, Rantanen J. Promotion of work ability during ageing. *American Journal of Industrial Medicine*. 1999;21-3.
4. Tuomi K, Huuhtanen P, Nykyri E, Ilmarinen J. Promotion of work ability, the quality of work and retirement. *Occupational Medicine-Oxford*. 2001;51(5):318-24.
5. Sell L. Predicting long-term sickness absence and early retirement pension from self-reported work ability. *International Archives of Occupational and Environmental Health*. 2009;82(9):1133-8.
6. Alavinia SM, van den Berg TIJ, van Duivenbooden C, Elders LAM, Burdorf A. Impact of work-related factors, lifestyle, and work ability on sickness absence among Dutch construction workers. *Scandinavian Journal of Work Environment & Health*. 2009;35(5):325-33.
7. Lundin A, Kjellberg K, Leijon O, Punnett L, Hemmingsson T. The Association Between Self-Assessed Future Work Ability and Long-Term Sickness Absence, Disability Pension and Unemployment in a General Working Population: A 7-Year Follow-Up Study. *Journal of occupational rehabilitation*. 2016;26(2):195-203.
8. Burdorf A, Frings-Dresen MH, van Duivenbooden C, Elders LA. Development of a decision model to identify workers at risk of long-term disability in the construction industry. *Scand J Work Environ Health*. 2005;31 Suppl 2:31-6.
9. Ahlstrom L, Grimby-Ekman A, Hagberg M, Dellve L. The work ability index and single-item question: associations with sick leave, symptoms, and health--a prospective study of women on long-term sick leave. *Scandinavian journal of work, environment & health*. 2010;36(5):404-12.
10. van den Berg TI, Elders LA, de Zwart BC, Burdorf A. The effects of work-related and individual factors on the Work Ability Index: a systematic review. *Occupational and environmental medicine*. 2009;66(4):211-20.
11. Alavinia SM, van Duivenbooden C, Burdorf A. Influence of work-related factors and individual characteristics on work ability among Dutch construction workers. *Scand J Work Environ Health*. 2007;33(5):351-7.
12. Organization. WH. Global status report on noncommunicable diseases 2014. Geneva: World Health Organization; 2014.
13. Forouzanfar MH, Alexander L, Anderson HR, Bachman VF, Biryukov S, Brauer M, et al. Global, regional, and national comparative risk assessment of 79 behavioural, environmental and occupational, and metabolic risks or clusters of risks in 188 countries, 1990&#x2013;2013: a systematic analysis for the Global Burden of Disease Study 2013. *The Lancet*. 2015;386(10010):2287-323.
14. Ilmarinen J. The Work Ability Index (WAI). *Occupational Medicine*. 2007;57(2):160-.
15. Gould R, Ilmarinen J, Järvisalo J, Koskinen S. Dimensions of work ability. Results from the 2000 survey. Helsinki, Finland: Finnish Centre for Pensions; 2008.
16. van den Berg TIJ, Alavinia SM, Bredt FJ, Lindeboom D, Elders LAM, Burdorf A. The influence of psychosocial factors at work and life style on health and work ability among professional workers. *International Archives of Occupational and Environmental Health*. 2008;81(8):1029-36.
17. Arvidson E, Borjesson M, Ahlborg G, Jr., Lindegard A, Jonsdottir IH. The level of leisure time physical activity is associated with work ability-a cross sectional and prospective study of health care workers. *BMC Public Health*. 2013;13:855.

18. Mohammadi S, Ghaffari M, Abdi A, Bahadori B, Mirzamohammadi E, Attarchi M. Interaction of Lifestyle and Work Ability Index in Blue Collar Workers. *Global Journal of Health Science*. 2015;7(3):90-7.
19. van den Berg S, Burdorf A, Robroek SJW. Associations between common diseases and work ability and sick leave among health care workers. *International Archives of Occupational and Environmental Health*. 2017;1-9.
20. El Fassi M, Bocquet V, Majery N, Lair ML, Couffignal S, Mairiaux P. Work ability assessment in a worker population: comparison and determinants of Work Ability Index and Work Ability score. *Bmc Public Health*. 2013;13.
21. Andersen LL, Izquierdo M, Sundstrup E. Overweight and obesity are progressively associated with lower work ability in the general working population: cross-sectional study among 10,000 adults. *International Archives of Occupational and Environmental Health*. 2017;90(8):779-87.
22. Calatayud J, Jakobsen MD, Sundstrup E, Casana J, Andersen LL. Dose-response association between leisure time physical activity and work ability: Cross-sectional study among 3000 workers. *Scand J Public Health*. 2015;43(8):819-24.
23. Kaleta D, Makowiec-Dąbrowska T, Jegier A. Lifestyle Index and Work Ability. *International journal of occupational medicine and environmental health*2006. p. 170.
24. Abel-Hamid M, El-Bagoury L. Influence of individual, lifestyle and work-related factors on the work ability among office workers. *Egyptian Journal of Occupational Medicine*. 2012;36(1):1-13.
25. Meader N, King K, Moe-Byrne T, Wright K, Graham H, Petticrew M, et al. A systematic review on the clustering and co-occurrence of multiple risk behaviours. *BMC Public Health*. 2016;16(1):657.
26. Krokstad S, Ding D, Grunseit AC, Sund ER, Holmen TL, Rangul V, et al. Multiple lifestyle behaviours and mortality, findings from a large population-based Norwegian cohort study - The HUNT Study. *BMC Public Health*. 2017;17:58.
27. Tsai J, Ford ES, Li C, Zhao G, Pearson WS, Balluz LS. Multiple healthy behaviors and optimal self-rated health: findings from the 2007 Behavioral Risk Factor Surveillance System Survey. *Prev Med*. 2010;51(3-4):268-74.
28. Kwasniewska M, Kaleta D, Dzionkowska-Zaborszczyk E, Drygas W, Makowiec-Dabrowska T. Lifestyle index and self-rated health status. *International journal of occupational medicine and environmental health*. 2007;20(4):349-56.
29. Emberland JS, Knardahl S. Contribution of psychological, social, and mechanical work exposures to low work ability: a prospective study. *Journal of occupational and environmental medicine*. 2015;57(3):300-14.
30. Abrahamsen R, Svendsen MV, Henneberger PK, Gundersen GF, Torén K, Kongerud J, et al. Non-response in a cross-sectional study of respiratory health in Norway. *BMJ Open*. 2016;6(1).
31. Lindström I, Pallasaho P, Luukkonen R, Suojalehto H, Karjalainen J, Lauerma A, et al. Reduced work ability in middle-aged men with asthma from youth- a 20-year follow-up. *Respiratory Medicine*. 2011;105(6):950-5.
32. Krokstad S, Langhammer A, Hveem K, Holmen TL, Midthjell K, Stene TR, et al. Cohort Profile: The HUNT Study, Norway. *Int J Epidemiol*. 2013;42(4):968-77.
33. Mostad IL, Langaas M, Grill V. Central obesity is associated with lower intake of whole-grain bread and less frequent breakfast and lunch: results from the HUNT study, an adult all-population survey. *Applied Physiology, Nutrition, and Metabolism*. 2014;39(7):819-28.
34. Norwegian Institute of Public Health. The Oslo Health Study (HUBRO) [Article]. Oslo: Norwegian Institute of Public Health,; 2016 [updated 18.04.16. Available from: <https://www.fhi.no/en/studies/regional-health-studies/the-oslo-health-study-hubro/>.
35. Norwegian Directorate of Health (Helsedirektoratet). Anbefalinger om kosthold, ernæring og fysisk aktivitet (Norwegian guidelines on diet, nutrition and physical activity. 2014 (in Norwegian) Oslo: Helsedirektoratet; 2014 [cited 2017 10.05]. Available from: <https://helsedirektoratet.no/Lists/Publikasjoner/Attachments/806/Anbefalinger-om-kosthold-ertering-og-fysisk-aktivitet-IS-2170.pdf>.

- 1
  - 2
  - 3
  - 4
  - 5
  - 6
  - 7
  - 8
  - 9
  - 10
  - 11
  - 12
  - 13
  - 14
  - 15
  - 16
  - 17
  - 18
  - 19
  - 20
  - 21
  - 22
  - 23
  - 24
  - 25
  - 26
  - 27
  - 28
  - 29
  - 30
  - 31
  - 32
  - 33
  - 34
  - 35
  - 36
  - 37
  - 38
  - 39
  - 40
  - 41
  - 42
  - 43
  - 44
  - 45
  - 46
  - 47
  - 48
  - 49
  - 50
  - 51
  - 52
  - 53
  - 54
  - 55
  - 56
  - 57
  - 58
  - 59
  - 60
36. Handeland K, Kjellevoid M, Wik Markhus M, Eide Graff I, Froyland L, Lie O, et al. A Diet Score Assessing Norwegian Adolescents' Adherence to Dietary Recommendations-Development and Test-Retest Reproducibility of the Score. *Nutrients*. 2016;8(8).
37. Kurtze N, Rangul V, Hustvedt BE, Flanders WD. Reliability and validity of self-reported physical activity in the Nord-Trondelag Health Study: HUNT 1. *Scand J Public Health*. 2008;36(1):52-61.
38. Ernstsen L, Rangul V, Nauman J, Nes BM, Dalen H, Krokstad S, et al. Protective Effect of Regular Physical Activity on Depression After Myocardial Infarction: The HUNT Study. *The American journal of medicine*. 2016;129(1):82-8.e1.
39. World Health Organization. BMI classification 2004 [updated 24.05.2017. Available from: [http://apps.who.int/bmi/index.jsp?introPage=intro\\_3.html](http://apps.who.int/bmi/index.jsp?introPage=intro_3.html).
40. International Labour Office. International Standard. Classification of Occupations. Structure, group definitions and correspondence tables. ISCO-08. Geneva2012.
41. Rothman KJ, Greenland S. *Modern Epidemiology*: Lippincott Williams & Wilkins; 1998.
42. Silvers KM, Scott KM. Fish consumption and self-reported physical and mental health status. *Public Health Nutr*. 2002;5(3):427-31.
43. Smith AP. The concept of well-being: relevance to nutrition research. *Br J Nutr*. 2005;93 Suppl 1:S1-5.
44. Myint PK, Welch AA, Bingham SA, Surtees PG, Wainwright NW, Luben RN, et al. Fruit and vegetable consumption and self-reported functional health in men and women in the European Prospective Investigation into Cancer-Norfolk (EPIC-Norfolk): a population-based cross-sectional study. *Public Health Nutr*. 2007;10(1):34-41.
45. Blank L, Grimsley M, Goyder E, Ellis E, Peters J. Community-based lifestyle interventions: changing behaviour and improving health. *Journal of Public Health*. 2007;29(3):236-45.
46. Munoz MA, Fito M, Marrugat J, Covas MI, Schroder H. Adherence to the Mediterranean diet is associated with better mental and physical health. *Br J Nutr*. 2009;101(12):1821-7.
47. Warburton DER, Nicol CW, Bredin SSD. Health benefits of physical activity: the evidence. *CMAJ : Canadian Medical Association Journal*. 2006;174(6):801-9.
48. Gill DL, Hammond CC, Reifsteck EJ, Jehu CM, Williams RA, Adams MM, et al. Physical Activity and Quality of Life. *Journal of Preventive Medicine and Public Health*. 2013;46(Suppl 1):S28-S34.
49. Bertheussen GF, Romundstad PR, Landmark T, Kaasa S, Dale O, Helbostad JL. Associations between physical activity and physical and mental health--a HUNT 3 study. *Med Sci Sports Exerc*. 2011;43(7):1220-8.
50. Jakobsen MD, Sundstrup E, Brandt M, Jay K, Aagaard P, Andersen LL. Physical exercise at the workplace prevents deterioration of work ability among healthcare workers: cluster randomized controlled trial. *BMC Public Health*. 2015;15:1174.
51. Borak J. Obesity and the workplace. *Occupational Medicine*. 2011;61(4):220-2.
52. Yokota RTdC, Nusselder WJ, Robine J-M, Tafforeau J, Deboosere P, Van Oyen H. Contribution of Chronic Conditions to the Disability Burden across Smoking Categories in Middle-Aged Adults, Belgium. *PLoS ONE*. 2016;11(4):e0153726.
53. Mosdol A. Dietary assessment - the weakest link?: a dissertation exploring the limitations to questionnaire based methods of dietary assessment. [Ph.D]. Oslo: University of Oslo; 2004.
54. de Croon EM, Sluiter JK, Nijssen TF, Kammeijer M, Dijkmans BA, Lankhorst GJ, et al. Work ability of Dutch employees with rheumatoid arthritis. *Scandinavian journal of rheumatology*. 2005;34(4):277-83.
55. Sluiter JK, Frings-Dresen MH. Quality of life and illness perception in working and sick-listed chronic RSI patients. *Int Arch Occup Environ Health*. 2008;81(4):495-501.
56. Pohjonen T. Perceived work ability of home care workers in relation to individual and work-related factors in different age groups. *Occupational Medicine-Oxford*. 2001;51(3):209-17.
57. Koolhaas W, van der Klink JJJ, de Boer MR, Groothoff JW, Brouwer S. Chronic health conditions and work ability in the ageing workforce: the impact of work conditions, psychosocial

1  
2  
3 factors and perceived health. International Archives of Occupational and Environmental Health.  
4 2014;87(4):433-43.

5 58. Kjollesdal MR, Holmboe-Ottesen G, Mosdol A, Wandel M. The relative importance of  
6 socioeconomic indicators in explaining differences in BMI and waist:hip ratio, and the mediating  
7 effect of work control, dietary patterns and physical activity. Br J Nutr. 2010;104(8):1230-40.

8 59. Norwegian Institute of Public Health. Overweight and obesity in Norway [Fact Sheet].  
9 Norwegian Institute of Public Health; 2011 [updated 03.11.17. Available from:

10 [https://www.fhi.no/en/op/public-health-report-2014/risk--protective-factors/overweight-and-](https://www.fhi.no/en/op/public-health-report-2014/risk--protective-factors/overweight-and-obesity-in-norway---/#overweight-and-obesity-in-adults)  
11 [obesity-in-norway---/#overweight-and-obesity-in-adults.](https://www.fhi.no/en/op/public-health-report-2014/risk--protective-factors/overweight-and-obesity-in-norway---/#overweight-and-obesity-in-adults)

12 60. Soulakova JN, Hartman AM, Liu B, Willis GB, Augustine S. Reliability of adult self-reported  
13 smoking history: data from the tobacco use supplement to the current population survey 2002-2003  
14 cohort. Nicotine & tobacco research : official journal of the Society for Research on Nicotine and  
15 Tobacco. 2012;14(8):952-60.

16 61. Heffner JL, Kealey KA, Marek PM, Bricker JB, Ludman EJ, Peterson AV, Jr. Proactive telephone  
17 counseling for adolescent smokers: Comparing regular smokers with infrequent and occasional  
18 smokers on treatment receptivity, engagement, and outcomes. Drug and alcohol dependence.  
19 2016;165:229-35.  
20  
21  
22  
23  
24  
25  
26  
27  
28  
29  
30  
31  
32  
33  
34  
35  
36  
37  
38  
39  
40  
41  
42  
43  
44  
45  
46  
47  
48  
49  
50  
51  
52  
53  
54  
55  
56  
57  
58  
59  
60

**STROBE 2007 (v4) Statement—Checklist of items that should be included in reports of *cross-sectional studies***

| Section/Topic                | Item # | Recommendation                                                                                                                                                                       | Reported on page #                |
|------------------------------|--------|--------------------------------------------------------------------------------------------------------------------------------------------------------------------------------------|-----------------------------------|
| Title and abstract           | 1      | (a) Indicate the study's design with a commonly used term in the title or the abstract                                                                                               | 0                                 |
|                              |        | (b) Provide in the abstract an informative and balanced summary of what was done and what was found                                                                                  | 1                                 |
| <b>Introduction</b>          |        |                                                                                                                                                                                      |                                   |
| Background/rationale         | 2      | Explain the scientific background and rationale for the investigation being reported                                                                                                 | 3                                 |
| Objectives                   | 3      | State specific objectives, including any prespecified hypotheses                                                                                                                     | 4                                 |
| <b>Methods</b>               |        |                                                                                                                                                                                      |                                   |
| Study design                 | 4      | Present key elements of study design early in the paper                                                                                                                              | 4                                 |
| Setting                      | 5      | Describe the setting, locations, and relevant dates, including periods of recruitment, exposure, follow-up, and data collection                                                      | 4                                 |
| Participants                 | 6      | (a) Give the eligibility criteria, and the sources and methods of selection of participants                                                                                          | 4                                 |
| Variables                    | 7      | Clearly define all outcomes, exposures, predictors, potential confounders, and effect modifiers. Give diagnostic criteria, if applicable                                             | 5-7                               |
| Data sources/<br>measurement | 8*     | For each variable of interest, give sources of data and details of methods of assessment (measurement). Describe comparability of assessment methods if there is more than one group | 5-7                               |
| Bias                         | 9      | Describe any efforts to address potential sources of bias                                                                                                                            | 16                                |
| Study size                   | 10     | Explain how the study size was arrived at                                                                                                                                            | 8                                 |
| Quantitative variables       | 11     | Explain how quantitative variables were handled in the analyses. If applicable, describe which groupings were chosen and why                                                         | 5-7                               |
| Statistical methods          | 12     | (a) Describe all statistical methods, including those used to control for confounding                                                                                                | 7                                 |
|                              |        | (b) Describe any methods used to examine subgroups and interactions                                                                                                                  | 7                                 |
|                              |        | (c) Explain how missing data were addressed                                                                                                                                          | 4 and 8                           |
|                              |        | (d) If applicable, describe analytical methods taking account of sampling strategy                                                                                                   | 12 (multiple logistic regression) |
|                              |        | (e) Describe any sensitivity analyses                                                                                                                                                |                                   |

|                          |     |                                                                                                                                                                                                              |                                |
|--------------------------|-----|--------------------------------------------------------------------------------------------------------------------------------------------------------------------------------------------------------------|--------------------------------|
| <b>Results</b>           |     |                                                                                                                                                                                                              |                                |
| Participants             | 13* | (a) Report numbers of individuals at each stage of study—eg numbers potentially eligible, examined for eligibility, confirmed eligible, included in the study, completing follow-up, and analysed            | 4                              |
|                          |     | (b) Give reasons for non-participation at each stage                                                                                                                                                         |                                |
|                          |     | (c) Consider use of a flow diagram                                                                                                                                                                           |                                |
| Descriptive data         | 14* | (a) Give characteristics of study participants (eg demographic, clinical, social) and information on exposures and potential confounders                                                                     | Table 1 (page 9)               |
|                          |     | (b) Indicate number of participants with missing data for each variable of interest                                                                                                                          | Table 1 (page 9)               |
| Outcome data             | 15* | Report numbers of outcome events or summary measures                                                                                                                                                         | Table 2 (page 10)              |
| Main results             | 16  | (a) Give unadjusted estimates and, if applicable, confounder-adjusted estimates and their precision (eg, 95% confidence interval). Make clear which confounders were adjusted for and why they were included | Table 3 (page 11)              |
|                          |     | (b) Report category boundaries when continuous variables were categorized                                                                                                                                    | Table 2 (page 10),<br>page 5-7 |
|                          |     | (c) If relevant, consider translating estimates of relative risk into absolute risk for a meaningful time period                                                                                             |                                |
| Other analyses           | 17  | Report other analyses done—eg analyses of subgroups and interactions, and sensitivity analyses                                                                                                               | 7 (PAR)                        |
| <b>Discussion</b>        |     |                                                                                                                                                                                                              |                                |
| Key results              | 18  | Summarise key results with reference to study objectives                                                                                                                                                     | 13                             |
| Limitations              | 19  | Discuss limitations of the study, taking into account sources of potential bias or imprecision. Discuss both direction and magnitude of any potential bias                                                   | 15-16                          |
| Interpretation           | 20  | Give a cautious overall interpretation of results considering objectives, limitations, multiplicity of analyses, results from similar studies, and other relevant evidence                                   | 13-15                          |
| Generalisability         | 21  | Discuss the generalisability (external validity) of the study results                                                                                                                                        | 16                             |
| <b>Other information</b> |     |                                                                                                                                                                                                              |                                |
| Funding                  | 22  | Give the source of funding and the role of the funders for the present study and, if applicable, for the original study on which the present article is based                                                | Footnotes page 18              |

\*Give information separately for cases and controls in case-control studies and, if applicable, for exposed and unexposed groups in cohort and cross-sectional studies.

**Note:** An Explanation and Elaboration article discusses each checklist item and gives methodological background and published examples of transparent reporting. The STROBE checklist is best used in conjunction with this article (freely available on the Web sites of PLoS Medicine at <http://www.plosmedicine.org/>, Annals of Internal Medicine at <http://www.annals.org/>, and Epidemiology at <http://www.epidem.com/>). Information on the STROBE Initiative is available at [www.strobe-statement.org](http://www.strobe-statement.org).

For peer review only

1  
2  
3  
4  
5  
6  
7  
8  
9  
10  
11  
12  
13  
14  
15  
16  
17  
18  
19  
20  
21  
22  
23  
24  
25  
26  
27  
28  
29  
30  
31  
32  
33  
34  
35  
36  
37  
38  
39  
40  
41  
42  
43  
44  
45  
46  
47

# BMJ Open

## Lifestyle and work ability in a general working population in Norway – a cross-sectional study

|                                 |                                                                                                                                                                                                                                                                                                                                                                                      |
|---------------------------------|--------------------------------------------------------------------------------------------------------------------------------------------------------------------------------------------------------------------------------------------------------------------------------------------------------------------------------------------------------------------------------------|
| Journal:                        | <i>BMJ Open</i>                                                                                                                                                                                                                                                                                                                                                                      |
| Manuscript ID                   | bmjopen-2018-026215.R1                                                                                                                                                                                                                                                                                                                                                               |
| Article Type:                   | Research                                                                                                                                                                                                                                                                                                                                                                             |
| Date Submitted by the Author:   | 18-Jan-2019                                                                                                                                                                                                                                                                                                                                                                          |
| Complete List of Authors:       | Oellingrath, Inger; University College of Southeast Norway, Nursing and Health Sciences<br>De Bortoli, Marit; University of South-Eastern Norway, Department of Nursing and Health Sciences<br>Svendsen, Martin ; Sykehuset Telemark HF, Department of Occupational and Environmental Medicine<br>Fell, Anne Kristin; Sykehuset Telemark HF, Occupational and environmental Medicine |
| <b>Primary Subject Heading</b>: | Occupational and environmental medicine                                                                                                                                                                                                                                                                                                                                              |
| Secondary Subject Heading:      | Public health                                                                                                                                                                                                                                                                                                                                                                        |
| Keywords:                       | Lifestyle risk factors, Work ability, General working population                                                                                                                                                                                                                                                                                                                     |
|                                 |                                                                                                                                                                                                                                                                                                                                                                                      |

SCHOLARONE™  
Manuscripts

1  
2  
3 **Lifestyle and work ability in a general working population in Norway – a**  
4 **cross-sectional study**  
5  
6  
7  
8

9 Inger M. Oellingrath. Department of Nursing and Health Sciences. Faculty of Health- and  
10 Social Sciences. University of South-Eastern Norway. E-mail: [inger.m.oellingrath@usn.no](mailto:inger.m.oellingrath@usn.no)  
11

12  
13 Marit Müller De Bortoli. Kjølnes ring 56, 3918 Porsgrunn, Norway. Department of Nursing  
14 and Health Sciences. Faculty of Health- and Social Sciences. University of South-Eastern  
15 Norway. E-mail: [marit.muller@usn.no](mailto:marit.muller@usn.no). Telephone: +47 92626790 \*).  
16  
17

18  
19 Martin Veel Svendsen. Department of Occupational and Environmental Medicine. Telemark  
20 Hospital, Skien, Norway. E-mail: [martin.svendsen@sthf.no](mailto:martin.svendsen@sthf.no)  
21

22  
23 Anne Kristin Møller Fell. Department of Occupational and Environmental Medicine.  
24 Telemark Hospital, Skien, Norway. E-mail: [annfel@sthf.no](mailto:annfel@sthf.no)  
25  
26

27  
28  
29 \*) Corresponding author  
30  
31

32  
33 Word count: 4760  
34  
35  
36  
37  
38  
39  
40  
41  
42  
43  
44  
45  
46  
47  
48  
49  
50  
51  
52  
53  
54  
55  
56  
57  
58  
59  
60

## ABSTRACT

**Objectives:** The aim of this study was to investigate the association between multiple lifestyle-related risk factors (unhealthy diet, low leisure-time physical activity, overweight/obesity and smoking) and self-rated work ability in a general working population

**Setting:** Population-based cross-sectional study, in Telemark County, Norway, 2013.

**Participants:** A random sample of 50000 subjects were invited to answer a self-administered questionnaire, and 16099 responded. Complete data on lifestyle and work ability were obtained for 10355 participants aged 18-50 years all engaged in paid work during the preceding 12 months.

**Outcome measure:** Work ability was assessed using the Work Ability Score (WAS) – the first question in the Work Ability Index (WAI). To study association between multiple lifestyle risk factors and work ability, a lifestyle risk index was constructed and relationships examined using multiple logistic regression analysis.

**Results:** Low work ability was more likely among subjects with an unhealthy diet ( $OR_{adj}$  1.3, 95% CI 1.02 to 1.5), inactive persons ( $OR_{adj}$  1.4, 95% CI 1.2 to 1.6), obese respondents ( $OR_{adj}$  1.5, 95% CI 1.3 to 1.7), and former and current smokers ( $OR_{adj}$  1.2, 95% CI 1.1 to 1.4 and 1.3, 95% CI 1.2 to 1.5, respectively). An additive relationship was observed between the lifestyle risk index and the likelihood of decreased work ability (moderate risk score:  $OR_{adj}$ =1.3; CI 1.1 to 1.6; high risk score:  $OR_{adj}$ = 1.9; CI 1.6 to 2.2; very high risk score:  $OR_{adj}$ =2.4; CI 1.9 to 3.0). The overall population attributable fraction (PAF) of low work ability based on the overall risk index was 38%, while the PAFs of physical activity, smoking, BMI and diet were 16%, 11%, 11% and 6%, respectively.

**Conclusions:** Lifestyle risk factors were associated with low work ability. An additive relationship was observed. The findings are considered relevant to occupational intervention programmes aimed at prevention and improvement of decreased work ability.

**Key words:** Lifestyle risk factors, work ability, general working population

## Strengths and limitations of this study

- The study included 10355 subjects from the general working population in Telemark, Norway.
- Inclusion of several lifestyle-related factors allowed for examination of both independent and additive associations between lifestyle and work ability.
- The study is strengthened by inclusion of several adjustment variables/possible confounders (age, gender, educational level and occupation) in the regression analyses.
- Potential study limitations are selection bias due to non-response, the cross sectional design, lifestyle and weight self-reports and nonattendance of older than 50.

## BACKGROUND

As in many other European countries (1), Norway's population and workforce are ageing. The challenges this presents have given rise to government policies with stronger emphasis on work ability promotion and extension of working life. Work ability is a multifactorial concept encompassing the worker's health status, physical capacity and psychological resources (2) and may be defined as the balance between the self-perceived physical and mental capacity and work demands (2, 3).

Promoting and maintaining good work ability in all phases of working life is vital, as poor work ability has been linked with increased risk of reduced work quality (4), sickness absence (5-7), long-term disability (7, 8), early retirement (5, 9) and long-term unemployment (7). Good midlife work ability may also protect against old-age mobility limitation, regardless of type of retirement (10). A person's work ability may be influenced by various work-related and individual factors (11, 12). At the individual level, lifestyle-related factors (such as diet, physical activity, BMI and smoking) are known to have a significant impact on health (13, 14). However, the contribution of lifestyle to variation in work ability is not fully understood. The most commonly used method for assessing self-rated work ability is the Work Ability Index (WAI), developed by researchers of the Finish Institute of Occupational Health (15). A corresponding instrument is the first single-item question in the WAI, the Work Ability Score (WAS) (16).

Previous cross-sectional and longitudinal studies have investigated the relationship between different lifestyle factors and work ability (measured by WAI or WAS) (11, 12, 17-26). A systematic review covering 14 cross-sectional and six longitudinal studies of lifestyle and work ability published from 1985 to 2006 has identified low leisure-time physical activity and obesity as important determinants of decreased work ability in different occupational groups (11). Recent studies support these findings (12, 17-23, 25-27). A limited number of studies have indicated a positive association between healthy diet indicators (high intake of fibre/fruits and vegetables) and good work ability (11, 24, 27). Non-smoking has also been associated with good work ability in some studies (6, 11, 19), although the results on smoking and work ability remain inconclusive (11, 17). Previous studies have commonly focused on distinct occupational groups, groups with certain job demands, and selected age groups (11, 12, 17-20, 23, 26, 27), rather than on general working populations (21, 22, 24). Additional studies assessing large general working populations are warranted to investigate whether lifestyle changes could enhance work ability across occupations and ages.

Lifestyle-related risk factors are often observed together (28). Previous lifestyle and health studies have shown associations between multiple lifestyle risk indicators on non-communicable, chronic diseases and all-cause mortality (29), self-rated health (30, 31), long-term work disability (early retirement) (8), and sickness absence due to several diseases (32). However, few studies have focused on associations between multifactorial lifestyle risk and work ability. It appears that only one small (n=187) Polish study conducted among professionally active subjects has investigated the additive relationship between multiple, simultaneously applicable lifestyle indicators and modification of work ability. In that study, the authors identified an additive association between a healthy lifestyle index (incorporating recommended physical activity, normal BMI, non-smoking and fibre intake) and increasing WAI (24). Given the lack of larger studies exploring multifactorial associations between lifestyle and work ability, supplementary studies are needed. Available Norwegian studies have mainly investigated the effect of psychosocial, social and mechanical work exposure on work ability (33), rather than the potential contribution of lifestyle factors.

The aim of the present study was to investigate the association between lifestyle-related risk factors (unhealthy diet, low leisure-time physical activity, obesity and smoking) and self-rated work ability in a large general population of employed adults in Norway.

## METHODS

### Study population and design

The cross-sectional “Telemark Study” was carried out from February to August 2013 in Telemark County, which is located in the south-eastern part of Norway and has a population of about 170000. A sample of 50000 males and females aged 16 to 50 years, from the approximately 80000 residents in Telemark, was drawn randomly using the services of the Norwegian national population registry. Of the 50000 who received the questionnaire, 1793 had moved, four were deceased, 13 were unable to answer due to disease or disability, 23 could not answer due to language problems and 25 were ineligible for other reasons. Of the 48142 eligible participants, a total of 16099 answered the questionnaire, resulting in a response rate of 33%. Participation was highest among the older age groups, women and participants from urban areas. The data collection and recruitment methods and characteristics of the non-responders have been described in detail elsewhere (34).

1  
2  
3 Participants were asked questions on diet, physical activity, height and weight, and background  
4 variables at baseline. Employees were defined as subjects engaged in paid work during the  
5 preceding 12 months. Participants aged 16–17 years were excluded from the study due to low  
6 work engagement in this group. Complete data for the present analyses (diet, physical activity,  
7 smoking habits, height and weight and work ability) were available for 10355 participants.  
8  
9

### 12 **Work ability**

14 Self-rated work ability was assessed using the first single-item question in the WAI (15), the  
15 Work Ability Score (WAS) (16): “Current work ability compared with the lifetime best”, where  
16 a score of 0 represents complete work disability and a score of 10 represents work ability at its  
17 best. Previous studies have demonstrated a strong association between WAS and the complete  
18 WAI (9, 21). WAS has been recommended and used as a simple, reliable indicator of work  
19 ability in several population studies (5, 9, 17, 21, 35). In this study, work ability was divided  
20 into two categories: low work ability (score 0–7) and good work ability (score 8–10) (20, 21,  
21 25, 35).  
22  
23  
24  
25  
26  
27

### 28 **Diet**

30 Diet was determined using food frequency questions previously used in the Norwegian  
31 population-based Nord-Trøndelag Health Study (HUNT3) (2006–2008) (36, 37). The questions  
32 were selected from a larger validated food frequency questionnaire used in the Oslo Health  
33 Study of 2001 (HUBRO) (38) and covered habitual intake of fruits/berries, vegetables, boiled  
34 potatoes, pasta/rice, fat fish, sausages/hamburgers and chocolate/candies, with the response  
35 options “0–3 times/month”, “1–3 times/week”, “4–6 times/week”, “1 time/day”, and “≥2  
36 times/day”. To reflect general dietary advice for improved health (39), the following indicators  
37 and cut-off points were used: intake of fruits/berries and vegetables (≥2 times/day), fat fish (1–3  
38 times/week) and sausages/hamburgers and chocolate/candies (≤ 1–3 times/week). The  
39 responses were coded 0 (not meeting general dietary recommendations), or 1 (meeting general  
40 dietary recommendations). A diet sum score for each participant (scale 0–4) was calculated by  
41 summarising their scores for the four indicators, reflecting the number of recommendations met  
42 (40). The diet score was trichotomised into the categories “unhealthy” (0–1), “average” (2) and  
43 “healthy” (3–4) diet, to indicate different levels of health risk.  
44  
45  
46  
47  
48  
49  
50  
51  
52  
53  
54  
55  
56  
57  
58  
59  
60

### **Physical activity**

Moderate to vigorous leisure-time physical activity (MVPA) was assessed using questions covering frequency, intensity and duration of exercise used in the HUNT1 (1984–1986) and HUNT3 (2006–2008) studies (41). The questionnaire has previously been validated against objective measurement methods and the International Physical Activity Questionnaire (IPAQ), with good internal consistency (41). The participants reported average weekly frequency of exercise by answering the question, “How frequently do you exercise?”, which had the following answer options: “never”, “less than once a week”, “once a week”, “2–3 times a week” and “almost every day (4–7 times a week)”. Average intensity was reported by answering the question, “If you exercise once or more a week, how hard do you exercise?”, which had the following answer options: “I do not become sweaty or breathless”, “I become sweaty or breathless” and “I become almost exhausted”. Average duration was reported by answering the question, “For how long are you normally physically active?”, which had the following answer options: “less than 15 minutes”, “15–29 minutes”, “30 min–1 hour” and “more than 1 hour”. To reflect recommendations on adult MVPA ( $\geq 150$  minutes/week) (39), the responses to the three questions were combined to give a total MVPA score (41). This was labelled “Physical activity” and dichotomised into “active” and “inactive”. The weighted scores used to calculate the total score and the cut-off point reflecting recommended MVPA were set according to the values used in the HUNT1 and HUNT3 studies (41, 42).

### **BMI categories**

BMI categories (underweight, normal weight, overweight, obesity) were calculated based on self-reported height and weight data. Cut-off points were chosen according to the World Health Organization reference values for adults: underweight ( $<18.5$ ), normal weight (18.5–24.9), overweight (25–29.9) and obese ( $\geq 30$ ) (43).

### **Smoking**

Smoking was measured by asking three questions. The first was, “Do you smoke every day?” Two follow-up questions were then asked: “Do you smoke occasionally?” and “If not, have you smoked in the past?” Smoking habits were divided into three categories labelled “current smoker” (every day and occasional smoking combined), “former smoker” and “never smoked”.

### **Lifestyle risk index**

Based on current knowledge of associations between lifestyle, health and non-communicable diseases, an overall lifestyle risk index was constructed to study the possible association

1  
2  
3 between multiple lifestyle risk factors and low work ability. To indicate overall lifestyle risk,  
4 the individual lifestyle factors were given weighted risk scores – 0 (low health risk), 0.5  
5 (intermediate health risk) and 1 (high health risk) – and then summed into an overall index  
6 ranging from 0 to 4. To study different levels of lifestyle risk, the lifestyle risk index was divided  
7 into four categories: “low risk score” (total score 0–0.5), “moderate risk score” (total score 1–  
8 1.5), “high risk score” (total score 2–2.5) and “very high risk score” (total score 3–4). The index  
9 was labelled “Lifestyle risk index”.

### 15 **Adjustment variables**

#### 17 *Age:*

18 The participants were all between 18 and 50 years of age, and were grouped into three  
19 categories: “18–30 years”, “31–40 years” and “41–50 years”.

#### 23 *Educational level:*

24 The participants’ educational level was categorised as follows: “primary and lower secondary  
25 education” (10 years or less), “upper secondary education” (an additional three to four years),  
26 and “university or university college”.

#### 31 *Occupational group:*

32 The participants were classified by a trained research assistant based on self-reported current  
33 occupation (2013), using the International Standard Classification of Occupations (ISCO-88)  
34 coding system (44). The ten occupational groups were further combined into five subgroups for  
35 use in the analyses.

### 41 **Statistical analysis**

42 Spearman’s rho was used to assess correlation between the individual lifestyle risk factors.  
43 Multiple logistic regression analysis was used to assess associations between the four individual  
44 lifestyle factors and the multifactorial lifestyle risk index (independent variables), as well as the  
45 likelihood of low work ability (dependent variable). The individual lifestyle variables were  
46 mutually adjusted in the respective models. Odds ratios (OR) with 95% confidence intervals  
47 were calculated for the likelihood of low work ability. Forward conditional selection was  
48 applied to include available adjustment variables (gender, age, educational level and  
49 occupational group) associated with the respective independent variables in the models. The  
50 population attributable fraction (PAF) of low work ability was calculated for each lifestyle risk  
51  
52  
53  
54  
55  
56  
57  
58  
59  
60

1  
2  
3 factor and the index (45). PAF is defined as the fraction of all cases of a particular disease or  
4 other adverse condition in a population that is attributable to specific exposure.  
5

6  
7 Only participants with complete data for all main variables (lifestyle variables and WAS) were  
8 included in the analyses. Respondents with missing values for adjustment variables were  
9 included with “missing” as a separate adjustment variable category. For all tests,  $P < 0.05$  was  
10 considered significant. The questionnaires were scanned by Eyes and Hands (Read-soft Forms,  
11 Helsingborg, Sweden), while the statistical analyses were carried out using IBM SPSS Statistics  
12 for Windows, version 23.  
13  
14  
15  
16  
17

### 18 19 20 **Patient and Public Involvement**

21  
22 To release the full potential of the study we have involved user-representatives in the study  
23 planning, design and transfer of knowledge. Resourceful user representatives are engaged in  
24 the dissemination of results to the public, policy makers and to health care workers through  
25 regional, national and international media on all platforms (newspapers, internet, radio and  
26 television). An user-representative is member of the steering committee and has given valuable  
27 contributions in development of questionnaires. In addition user representatives are involved in  
28 piloting the questionnaire.  
29  
30  
31  
32  
33  
34  
35  
36

## 37 **RESULTS**

38  
39 A total of 16099 of the 48142 eligible subjects answered the questionnaire. Of these, 12932 had  
40 been employed during the preceding 12 months and were aged 18 or older. Complete data on  
41 lifestyle variables and work ability were obtained for 10355 respondents. Further background  
42 characteristics of the study population are shown in Table 1. The distributions of the main  
43 variables are specified in Table 2. The associations between multiple and independent  
44 associations between individual lifestyle factors and the likelihood of low work ability are  
45 presented in Table 3.  
46  
47  
48  
49  
50  
51  
52  
53  
54  
55  
56  
57  
58  
59  
60

Table 1 Study population characteristics (n = 10,355).

| Population characteristics                                                                         | N (%)       |
|----------------------------------------------------------------------------------------------------|-------------|
| <b>Gender</b>                                                                                      |             |
| Males                                                                                              | 4774 (46.1) |
| Females                                                                                            | 5581 (53.9) |
| <b>Age group</b>                                                                                   |             |
| 18–30                                                                                              | 2708 (26.2) |
| 31–40                                                                                              | 2964 (28.6) |
| 41–50                                                                                              | 4683 (45.2) |
| <b>Educational level</b>                                                                           |             |
| Primary school and lower secondary education (10 years or less)                                    | 1018 (9.8)  |
| Upper secondary education (an additional three to four years)                                      | 4242 (41.0) |
| University or university college                                                                   | 4794 (46.3) |
| Missing                                                                                            | 301 (2.9)   |
| <b>Occupational group</b>                                                                          |             |
| Legislators, senior officials and managers and professionals and armed forces (groups 0–I–II only) | 2674 (25.8) |
| Technicians and associated professionals (group III)                                               | 2646 (25.6) |
| Clerks and service workers and shop and market sales workers (groups IV–V)                         | 1383 (13.4) |
| Skilled agriculture and fishery workers and craft and related trade workers (groups VI–VII)        | 1219 (11.8) |
| Plant and machine operators and assemblers and elementary occupations (groups VIII–IX)             | 1024 (9.9)  |
| Missing                                                                                            | 1409 (13.6) |

Table 2 Study population, distribution of main variables and risk scores (n=10,355).

|                               | Total<br>(n=10,355)<br>n (%) | Lifestyle index<br>risk score* |
|-------------------------------|------------------------------|--------------------------------|
| <b>Diet</b>                   |                              |                                |
| Healthy                       | 5851 (56.5)                  | (0)                            |
| Average                       | 3700 (35.7)                  | (0.5)                          |
| Unhealthy                     | 804 (7.8)                    | (1)                            |
| <b>Physical activity (PA)</b> |                              |                                |
| Active                        | 5332 (51.5)                  | (0)                            |
| Inactive                      | 5023 (48.5)                  | (1)                            |
| <b>BMI category</b>           |                              |                                |
| Normal weight                 | 4951 (47.8)                  | (0)                            |
| Underweight (<18,5)           | 128 (1.2)                    | (0.5)                          |
| Overweight (25–30)            | 3733 (36.1)                  | (0.5)                          |
| Obese (>30)                   | 1543 (14.9)                  | (1)                            |
| <b>Smoking status</b>         |                              |                                |
| Never smoked                  | 5555 (53.6)                  | (0)                            |
| Former smoker                 | 2298 (22.2)                  | (0.5)                          |
| Current smoker                | 2502 (24.2)                  | (1)                            |
| <b>Lifestyle risk index</b>   |                              |                                |
| Low risk (0–0.5)              | 2592 (25.0)                  |                                |
| Moderate risk (1–1.5)         | 4030 (38.9)                  |                                |
| High risk (2–2.5)             | 2895 (28.0)                  |                                |
| Very high risk (3–4)          | 838 (8.1)                    |                                |
| <b>Work ability score</b>     |                              |                                |
| Low work ability (0–7)        | 1379 (13.3)                  |                                |
| Good work ability (8–10)      | 8976 (86.7)                  |                                |

\* The numbers in brackets are the risk scores used for each variable when calculating the lifestyle risk index.

Table 3 Associations between lifestyle factors and likelihood of low work ability (n=10,355)

| Model 1                       | OR <sub>crude</sub>    | OR <sub>adj1</sub> *  | OR <sub>adj2</sub> **  |
|-------------------------------|------------------------|-----------------------|------------------------|
| <b>Diet</b>                   |                        |                       |                        |
| Healthy (ref.)                | 1.0                    | 1.0                   | 1.0                    |
| Average                       | <b>1.2 (1.03, 1.3)</b> | 1.1 (0.98, 1.3)       | 1.1 (0.98, 1.3)        |
| Unhealthy                     | <b>1.4 (1.2, 1.7)</b>  | <b>1.3 (1.1, 1.6)</b> | <b>1.3 (1.02, 1.5)</b> |
| <b>Physical activity (PA)</b> |                        |                       |                        |
| Active (ref.)                 | 1.0                    | 1.0                   | 1.0                    |
| Inactive                      | <b>1.6 (1.4, 1.8)</b>  | <b>1.4 (1.3, 1.6)</b> | <b>1.4 (1.2, 1.6)</b>  |
| <b>BMI</b>                    |                        |                       |                        |
| Normal weight (ref.)          | 1.0                    | 1.0                   | 1.0                    |
| Underweight (BMI <18,5)       | 1.5 (0.91, 2.4)        | 1.4 (0.86, 2.2)       | 1.3 (0.82, 2.2)        |
| Overweight (BMI 25–30)        | <b>1.2 (1.01, 1.3)</b> | 1.1 (0.97, 1.3)       | 1.1 (0.97, 1.3)        |
| Obese (BMI >30)               | <b>1.6 (1.4, 1.9)</b>  | <b>1.5 (1.3, 1.8)</b> | <b>1.5 (1.3, 1.7)</b>  |
| <b>Smoking status</b>         |                        |                       |                        |
| Never smoked (ref.)           | 1.0                    | 1.0                   | 1.0                    |
| Former smoker                 | <b>1.4 (1.2, 1.6)</b>  | <b>1.4 (1.2, 1.6)</b> | <b>1.2 (1.1, 1.4)</b>  |
| Current smoker                | <b>1.6 (1.4, 1.9)</b>  | <b>1.5 (1.3, 1.8)</b> | <b>1.3 (1.2, 1.5)</b>  |
| Model 2                       | OR <sub>crude</sub>    | OR <sub>adj2</sub> ** |                        |
| <b>Lifestyle risk index</b>   |                        |                       |                        |
| Low risk score (0–0.5)        | 1.0                    | 1.0                   |                        |
| Moderate risk score (1–1.5)   | <b>1.4 (1.2, 1.7)</b>  | <b>1.3 (1.1, 1.6)</b> |                        |
| High risk score (2–2.5)       | <b>2.2 (1.8, 2.5)</b>  | <b>1.9 (1.6, 2.2)</b> |                        |
| Very high risk score (3–4)    | <b>2.8 (2.3, 3.5)</b>  | <b>2.4 (1.9, 3.0)</b> |                        |

\* Adjusted for other lifestyle factors.

\*\* Adjusted for other lifestyle factors, gender, age, educational level and occupational group.

1  
2  
3 Spearman's rho correlations between individual lifestyle-related risk factors were ranging from  
4 0.027 between BMI and diet to 0.117 between physical activity and diet. Multiple logistic  
5 regression showed independent associations between individual lifestyle factors and the  
6 likelihood of low work ability (Table 3, Model 1). Participants in the category "unhealthy diet"  
7 were more likely to have low work ability than participants with a "healthy diet" ( $OR_{adj2}=1.3$ ;  
8 CI 1.02 to 1.5). Inactive subjects were more likely to have low work ability than active  
9 individuals ( $OR_{adj2}= 1.4$ ; CI 1.2 to 1.6). Obese participants had lower work ability than normal-  
10 weight subjects ( $OR_{adj2}= 1.5$ ; CI 1.3 to 1.7). Former and current smokers were more likely to  
11 have low work ability than those who had never smoked ( $OR_{adj2}= 1.2$ ; CI 1.1 to 1.4, and adjusted  
12  $OR_{adj2}= 1.3$ ; CI 1.2 to 1.5, respectively). All associations were observed independently of other  
13 lifestyle factors and available background variables (gender, age, educational level and  
14 occupational group).

15  
16 An association was observed between the lifestyle risk index and the likelihood of low work  
17 ability (Table 3, Model 2). The figures were as follows: moderate risk score:  $OR_{adj2}=1.3$ ; CI 1.1  
18 to 1.6; high risk score:  $OR_{adj2}= 1.9$ ; CI 1.6 to 2.2; very high risk score:  $OR_{adj2}=2.4$ ; CI 1.9 to  
19 3.0. The analyses were adjusted for available background variables. The overall PAF of low  
20 work ability based on the overall risk scores was 38%, while the PAFs of physical activity,  
21 smoking, BMI and diet were 16%, 11%, 11% and 6%, respectively.

## 39 DISCUSSION

40  
41 In the present study, consistent associations were found between several lifestyle risk factors  
42 and self-rated low work ability in a general working population in Norway. Obesity was the  
43 factor which was most strongly associated with low work ability, followed by low physical  
44 activity, current smoking and unhealthy diet/former smoking. Further, an additive relationship  
45 was observed between multiple risk factors and work ability. Increasing scores on a multiple  
46 lifestyle risk index were associated with increasing likelihood of low work ability. An overall  
47 PAF of 38% indicated a substantial contribution of lifestyle to work ability. Of the individual  
48 lifestyle factors, low physical activity had the highest observed PAF (16%). All associations  
49 were observed independently of gender, age, educational level and occupation.  
50  
51  
52  
53  
54  
55  
56  
57  
58  
59  
60

1  
2  
3 A direct comparison with other studies is difficult, due to heterogeneity of study design,  
4 definition and measurement of lifestyle indicators, varying population sizes and varying use of  
5 complete WAI or WAS. However, some similarities and differences can be noted.  
6  
7

8  
9 The results agree with previous studies in which unhealthy diet indicators were linked with low  
10 work ability (11, 24, 27). Unhealthy diet, characterised by low consumption of healthy foods  
11 or nutrients, has previously been associated with low mental and physical health in a number  
12 of population studies (46-50). Work ability has previously been strongly associated with mental  
13 and physical health (17). One possible explanation for the findings is that an unhealthy diet may  
14 influence self-perceived work ability through decreased physical and mental capacity related to  
15 job demands (2). Currently, little information is available on how measures to promote healthy  
16 eating at the workplace can have positive impact in this context. However, the results indicate  
17 that a diet close to the recommended composition could improve work ability.  
18  
19  
20  
21  
22  
23

24  
25 There is convincing evidence that regular physical activity helps to prevent various chronic  
26 diseases and improve health-related quality of life (51-53). It is therefore likely that physically  
27 active individuals are better equipped to meet physical and psychological demands at work, and  
28 to achieve better work ability. In accordance with previous occupation-specific studies (11, 17-  
29 20, 24, 26, 27), low leisure-time physical activity was associated with low work ability in the  
30 present sample from the general working population. Earlier studies indicate that the benefits  
31 of and need for physical activity differ between job types. A recently published Danish study  
32 focusing on workers performing physically demanding tasks concluded that physical activity  
33 must be of high intensity and long duration to increase work ability (23). In contrast, it has also  
34 been suggested that mentally demanding jobs do not necessarily require good physical  
35 condition to meet work demands, at least not among younger workers (17). A Swedish  
36 prospective study of healthcare workers found that leisure-time physical activity at the  
37 recommended level or higher improved work ability both immediately and in the longer term  
38 (18). Correspondingly, the results in the present study show that achieving the recommended  
39 level of weekly leisure time MVPA reduces the likelihood of low work ability, indicating a  
40 beneficial effect across occupations and ages. Further, recent research indicates that physical  
41 activity at the workplace may have an additional favourable impact on work ability due to  
42 positive effects on social relationships and psychological wellbeing (54).  
43  
44  
45  
46  
47  
48  
49  
50  
51  
52  
53  
54

55  
56 In line with previous studies (11, 17, 19, 20, 24, 27), a significant association was observed  
57 between obesity and low work ability. Obese respondents had a 50% higher likelihood of low  
58 work ability than respondents with a normal weight. In a systematic review published in 2009,  
59  
60

1  
2  
3 five out of seven studies (mainly concentrating on Finnish municipal workers and caregivers)  
4 reported an association between obesity and low work ability in different occupational groups  
5 (11). A recent Danish study of a general working population of 10000 adults has shown that  
6 increasing BMI above normal range is associated with lower work ability (22). A similar trend  
7 was observed in the present study, with the likelihood of decreased work ability increasing  
8 gradually as BMI rises. However, the results for the overweight respondents did not reach  
9 significance in the adjusted models. There are several possible explanations for the observed  
10 association, ranging from individual health problems due to obesity to psychosocial problems  
11 and physical limitations at the workplace (55).

12  
13  
14  
15  
16  
17  
18  
19 Smokers (both current and former) showed a higher likelihood of low work ability than non-  
20 smokers. However, there is no unanimous agreement on this association. While some studies  
21 have failed to demonstrate a significant difference (17, 21, 27), other studies support our  
22 findings (19, 20, 24). A Dutch study of workers with common diseases found significance only  
23 for participants with respiratory diseases (20), while another study found significance for  
24 women only (24). In contrast, the effect of occasional smoking on work ability has been found  
25 to be more evident for men than for women (56). Contradictory findings may be explained by  
26 the fact that earlier studies have examined different occupational groups, not the general  
27 working population. A possible explanation for the observed association is impaired health  
28 status or chronic conditions due to current or former smoking, which in turn may have impaired  
29 work ability (56). The results indicate that former smokers may also be at risk of low work  
30 ability, emphasising the importance of assessing this group as well.

31  
32  
33  
34  
35  
36  
37  
38  
39  
40 Although the individual lifestyle risk factors appeared to be slightly correlated, independent  
41 associations with low work ability were observed for each factor. The individual factors were  
42 added up to compose a lifestyle risk index. Lifestyle risk indexes can be used as indicators of  
43 overall or cumulative risk of non-communicable diseases (29) As suggested by others (24), an  
44 additive association was observed between lifestyle risk factors and work ability. Participants  
45 with a high or very high risk score on the lifestyle risk index were more than twice as likely to  
46 have low work ability, than those with a low risk score. The effect seems to be additive rather  
47 than synergetic as the strength of the associations of more than one risk factor was not stronger  
48 than the sum of the risks of the underlying factors (20). Moreover, additional analyses of the  
49 most prevalent risk-factor combinations did not show any significant synergetic effects either  
50 (data not shown). As the relative importance of the lifestyle risk factors to good health, non-  
51 communicable diseases and low work ability has not been fully determined, we decided to  
52  
53  
54  
55  
56  
57  
58  
59  
60

1  
2  
3 weight each factor equally in the lifestyle risk index. The decision to weight the single risk  
4 factors equally was further supported by the comparable effects of the individual factors on  
5 observed WAS (Table 3).  
6  
7

8  
9 A PAF of 38% indicates a substantial contribution of multiple lifestyle risk to low work ability.  
10 According to the lifestyle risk index, a considerable proportion (36%) of the participants had a  
11 high or very high risk score. Knowing that an unhealthy lifestyle increases the risk of various  
12 non-communicable diseases, it can be assumed that lifestyle changes in line with current health  
13 recommendations would improve the prognoses of these diseases and indirectly improve work  
14 ability. Although physical activity had the highest PAF, all four risk factors contributed  
15 significantly to low work ability, underlining the importance of targeting multiple lifestyle  
16 changes.  
17  
18  
19  
20  
21  
22

23 Although no causality can be claimed based on the present results, the associations indicate that  
24 occupational health promotion strategies should target multiple lifestyle changes to reduce the  
25 likelihood of decreased work ability. Lifestyle is theoretically modifiable, but often considered  
26 a personal matter with no formal responsibility resting with the employer. However, facilitating  
27 lifestyle changes through workplace measures may be beneficial for both employers and  
28 employees in terms of improved work ability.  
29  
30  
31  
32  
33

34 The present study has strengths, but also limitations that should be recognised. An important  
35 strength is the large study sample, which covers all types of occupational groups and a broad  
36 age range. Simultaneous assessment of several lifestyle-related factors has allowed mutual  
37 adjustment and examination of both independent and additive relationships. Further, the study  
38 has employed validated questions for diet (57), leisure time MVPA (41) and self-assessed work  
39 ability (9, 21). The dichotomisation of the total MVPA score into “active” and “inactive” gives  
40 good information on MVPA by reference to current recommendations on physical activity (39,  
41 41, 42). The dietary score appears to be a comprehensive indicator of healthy dietary behaviour,  
42 compared to previous studies in which the “diet” variable was either not fully elucidated (27)  
43 or consisted only of single nutrients or single food items (11, 24). The first single-item question  
44 of the WAI, the WAS (16) – “Current work ability compared with lifetime best” – was used to  
45 assess work ability. This item has become established as a practical, simple and valid indicator  
46 of work ability (9, 21), often replacing complete WAI in clinical practice and research (58, 59)  
47 and increasingly used in population studies (5, 9, 17, 21, 35). In accordance with these studies,  
48 work ability was considered to be good when the score was between 8 and 10.  
49  
50  
51  
52  
53  
54  
55  
56  
57  
58  
59  
60

1  
2  
3 Several individual and environmental factors have previously been associated with decreased  
4 work ability and/or lifestyle (11, 17, 60-62). To investigate independent relationships between  
5 lifestyle and work ability, several adjustment variables (age, gender, educational level and  
6 occupation) were included in the regression analyses. However, the adjustment did not alter the  
7 estimates substantially, indicating independent associations and limited risk of over-adjustment.  
8 Nevertheless, the possibility cannot be excluded that other individual and environmental  
9 characteristics such as poor musculoskeletal capacity, chronic disease, psychosocial factors at  
10 work and high physical or mental work demands may have attenuated the associations (11, 17,  
11 20, 33, 61).

12  
13  
14  
15  
16  
17  
18  
19 The present study did not include workers older than 50 years of age. Therefore, it cannot be  
20 concluded that the findings are generalizable to older age groups. Previous research has  
21 indicated that lifestyle may be even more important to older workers than younger in terms of  
22 good work ability (11, 17). Moreover, promoting good work ability through a healthy lifestyle  
23 early on may reduce the risk of non-communicable chronic diseases and consequent impaired  
24 work ability later in life (14, 60).

25  
26  
27  
28  
29  
30  
31  
32  
33  
34  
35  
36  
37  
38  
39  
40  
41  
42  
43  
44  
45  
46  
47  
48  
49  
50  
51  
52  
53  
54  
55  
56  
57  
58  
59  
60  
Participants' self-reported diet and PA data may have caused bias due to under-reporting of  
unhealthy habits and/or over-reporting of healthy habits, or bias due to deficient recollection.  
However, the applied questions on food items and PA have demonstrated good reliability and  
validity when compared with objective measures and other validated questionnaires (41, 57).  
Self-reported weight and height is known to be prone to bias, and misreporting may have  
influenced the observed associations. Nevertheless, the proportion of participants in the  
overweight and obese categories was in line with national BMI data for adults (63). As regards  
to self-reported smoking history, previous studies have indicated high reliability of self-  
reporting (64). In addition, occasional smokers were included in the current smoker category to  
capture all at-risk respondents, as infrequent and occasional smokers may still have a nicotine  
dependency and may underreport (65).

Another limitation of the study is the low response rate (33%), which may have caused bias due  
to non-response (34). There was a predominance of participants from older age groups, women,  
and participants from urban areas. Further, only participants with complete data on lifestyle  
indicators and work ability were analysed. However, non-response to the postal questionnaire  
has been assessed (34), showing that responders and non-responders had similar frequencies of  
respiratory symptoms and asthma, but that young males and past smokers were somewhat

1  
2  
3 underrepresented and that weighting according to inverse probability of non-response did not  
4 alter the results substantially (data not shown).  
5  
6

7 Data collection was limited to one Norwegian county, and the results are therefore not  
8 necessarily representative of the national population. Finally, the study's cross-sectional design  
9 makes it impossible to identify causal relationships between lifestyle indicators and work  
10 ability.  
11  
12  
13  
14  
15

## 16 CONCLUSION

17  
18  
19 In the present study, significant associations have been identified between several lifestyle risk  
20 factors and low work ability in a general working population. Moreover, an additive  
21 relationship between multiple lifestyle risk factors and low work ability has been observed. The  
22 results indicate that employees in general may benefit from interventions targeting multiple  
23 lifestyle changes. Further, the results appear relevant to occupational intervention programmes  
24 aimed at preventing and improving low work ability. A follow-up study is planned to  
25 investigate the observed associations over time, with a particular focus on ageing and workers  
26 with chronic diseases.  
27  
28  
29  
30  
31  
32  
33  
34  
35  
36  
37  
38  
39  
40  
41  
42  
43  
44  
45  
46  
47  
48  
49  
50  
51  
52  
53  
54  
55  
56  
57  
58  
59  
60

## Footnotes

## List of abbreviations

WAI: work ability index; WAS: work ability score; MVPA: moderate to vigorous physical activity; PAF: population based attributable fraction.

## Declarations

### *Authors' contribution*

AKMF and MVS were involved in the conception, design and data collection. IMO was involved in selection of research questions and planning of the statistical analyses. MVS was responsible for the statistical analyses. All authors were involved in the interpretation of the results. IMO drafted the manuscript with the assistance from MMDB. All authors revised the manuscript critically and approved the final manuscript.

### *Funding*

The research was supported by funding from University of South-Eastern Norway and Telemark Hospital.

### *Competing interests*

The authors declare that they have no competing interest.

### *Ethics approval*

The study was conducted in accordance with the guidelines laid down in the Declaration of Helsinki, and were approved by the Regional Committee for Ethics in Medical Research and the Norwegian Data Protection Authority (REC 2012/1665).

**Acknowledgements** The authors thank Regine Abrahamsen, Geir Klepaker and Gølin Finkenhagen Gundersen for data collection. The authors are grateful to Professor Johny Kongerud for contribution to the design of the main study.

### *Consent for publication*

Not applicable.

### *Availability of data and materials*

The datasets generated and/or analysed during the current study are not publicly available due to individual privacy regulations, but are available from the corresponding author on reasonable request

## References

1. Ilmarinen J. Ageing workers in Finland and in the European Union: Their situation and the promotion of their working ability, employability and employment. *Geneva Papers on Risk and Insurance-Issues and Practice*. 2001;26(4):623-41.
2. Tuomi K, Ilmarinen J, Seitsamo J, Huuhtanen P, Martikainen R, Nygard CH, et al. Summary of the Finnish research project (1981-1992) to promote the health and work ability of aging workers. *Scandinavian journal of work, environment & health*. 1997;23 Suppl 1:66-71.
3. Ilmarinen J, Rantanen J. Promotion of work ability during ageing. *American Journal of Industrial Medicine*. 1999:21-3.
4. Tuomi K, Huuhtanen P, Nykyri E, Ilmarinen J. Promotion of work ability, the quality of work and retirement. *Occupational Medicine-Oxford*. 2001;51(5):318-24.
5. Sell L. Predicting long-term sickness absence and early retirement pension from self-reported work ability. *International Archives of Occupational and Environmental Health*. 2009;82(9):1133-8.
6. Alavinia SM, van den Berg TIJ, van Duivenbooden C, Elders LAM, Burdorf A. Impact of work-related factors, lifestyle, and work ability on sickness absence among Dutch construction workers. *Scandinavian Journal of Work Environment & Health*. 2009;35(5):325-33.
7. Lundin A, Kjellberg K, Leijon O, Punnett L, Hemmingsson T. The Association Between Self-Assessed Future Work Ability and Long-Term Sickness Absence, Disability Pension and Unemployment in a General Working Population: A 7-Year Follow-Up Study. *Journal of occupational rehabilitation*. 2016;26(2):195-203.
8. Burdorf A, Frings-Dresen MH, van Duivenbooden C, Elders LA. Development of a decision model to identify workers at risk of long-term disability in the construction industry. *Scandinavian journal of work, environment & health*. 2005;31 Suppl 2:31-6.
9. Ahlstrom L, Grimby-Ekman A, Hagberg M, Dellve L. The work ability index and single-item question: associations with sick leave, symptoms, and health--a prospective study of women on long-term sick leave. *Scandinavian journal of work, environment & health*. 2010;36(5):404-12.
10. von Bonsdorff ME, Rantanen T, Tormakangas T, Kulmala J, Hinrichs T, Seitsamo J, et al. Midlife work ability and mobility limitation in old age among non-disability and disability retirees--a prospective study. *BMC Public Health*. 2016;16:154.
11. van den Berg TI, Elders LA, de Zwart BC, Burdorf A. The effects of work-related and individual factors on the Work Ability Index: a systematic review. *Occupational and environmental medicine*. 2009;66(4):211-20.
12. Alavinia SM, van Duivenbooden C, Burdorf A. Influence of work-related factors and individual characteristics on work ability among Dutch construction workers. *Scandinavian journal of work, environment & health*. 2007;33(5):351-7.
13. Organization. WH. Global status report on noncommunicable diseases 2014. Geneva: World Health Organization; 2014.
14. Forouzanfar MH, Alexander L, Anderson HR, Bachman VF, Biryukov S, Brauer M, et al. Global, regional, and national comparative risk assessment of 79 behavioural, environmental and occupational, and metabolic risks or clusters of risks in 188 countries, 1990&#x2013;2013: a systematic analysis for the Global Burden of Disease Study 2013. *The Lancet*. 2015;386(10010):2287-323.
15. Ilmarinen J. The Work Ability Index (WAI). *Occupational Medicine*. 2007;57(2):160-.
16. Gould R, Ilmarinen J, Järvisalo J, Koskinen S. Dimensions of work ability. Results from the 2000 survey. Helsinki, Finland: Finnish Centre for Pensions; 2008.
17. van den Berg TIJ, Alavinia SM, Bredt FJ, Lindeboom D, Elders LAM, Burdorf A. The influence of psychosocial factors at work and life style on health and work ability among professional workers. *International Archives of Occupational and Environmental Health*. 2008;81(8):1029-36.

18. Arvidson E, Borjesson M, Ahlberg G, Jr., Lindegard A, Jonsdottir IH. The level of leisure time physical activity is associated with work ability-a cross sectional and prospective study of health care workers. *BMC Public Health*. 2013;13:855.
19. Mohammadi S, Ghaffari M, Abdi A, Bahadori B, Mirzamohammadi E, Attarchi M. Interaction of Lifestyle and Work Ability Index in Blue Collar Workers. *Global Journal of Health Science*. 2015;7(3):90-7.
20. van den Berg S, Burdorf A, Robroek SJW. Associations between common diseases and work ability and sick leave among health care workers. *International Archives of Occupational and Environmental Health*. 2017:1-9.
21. El Fassi M, Bocquet V, Majery N, Lair ML, Couffignal S, Mairiaux P. Work ability assessment in a worker population: comparison and determinants of Work Ability Index and Work Ability score. *Bmc Public Health*. 2013;13.
22. Andersen LL, Izquierdo M, Sundstrup E. Overweight and obesity are progressively associated with lower work ability in the general working population: cross-sectional study among 10,000 adults. *International Archives of Occupational and Environmental Health*. 2017;90(8):779-87.
23. Calatayud J, Jakobsen MD, Sundstrup E, Casana J, Andersen LL. Dose-response association between leisure time physical activity and work ability: Cross-sectional study among 3000 workers. *Scand J Public Health*. 2015;43(8):819-24.
24. Kaleta D, Makowiec-Dąbrowska T, Jegier A. Lifestyle Index and Work Ability. *International journal of occupational medicine and environmental health*2006. p. 170.
25. Hult M, Pietila AM, Koponen P, Saaranen T. Association between good work ability and health behaviours among unemployed: A cross-sectional survey. *Applied nursing research : ANR*. 2018;43:86-92.
26. Nawrocka A, Garbaciak W, Cholewa J, Mynarski W. The relationship between meeting of recommendations on physical activity for health and perceived work ability among white-collar workers. *European journal of sport science*. 2018;18(3):415-22.
27. Abel-Hamid M, El-Bagoury L. Influence of individual, lifestyle and work-related factors on the work ability among office workers. *Egyptian Journal of Occupational Medicine*. 2012;36(1):1-13.
28. Meader N, King K, Moe-Byrne T, Wright K, Graham H, Petticrew M, et al. A systematic review on the clustering and co-occurrence of multiple risk behaviours. *BMC Public Health*. 2016;16(1):657.
29. Krokstad S, Ding D, Grunseit AC, Sund ER, Holmen TL, Rangul V, et al. Multiple lifestyle behaviours and mortality, findings from a large population-based Norwegian cohort study - The HUNT Study. *BMC Public Health*. 2017;17:58.
30. Tsai J, Ford ES, Li C, Zhao G, Pearson WS, Balluz LS. Multiple healthy behaviors and optimal self-rated health: findings from the 2007 Behavioral Risk Factor Surveillance System Survey. *Prev Med*. 2010;51(3-4):268-74.
31. Kwasniewska M, Kaleta D, Dziankowska-Zaborszczyk E, Drygas W, Makowiec-Dabrowska T. Lifestyle index and self-rated health status. *International journal of occupational medicine and environmental health*. 2007;20(4):349-56.
32. Virtanen M, Ervasti J, Head J, Oksanen T, Salo P, Pentti J, et al. Lifestyle factors and risk of sickness absence from work: a multicohort study. *The Lancet Public Health*. 2018;3(11):e545-e54.
33. Emberland JS, Knardahl S. Contribution of psychological, social, and mechanical work exposures to low work ability: a prospective study. *Journal of occupational and environmental medicine*. 2015;57(3):300-14.
34. Abrahamsen R, Svendsen MV, Henneberger PK, Gundersen GF, Torén K, Kongerud J, et al. Non-response in a cross-sectional study of respiratory health in Norway. *BMJ Open*. 2016;6(1).
35. Lindström I, Pallasaho P, Luukkonen R, Suojalehto H, Karjalainen J, Lauerma A, et al. Reduced work ability in middle-aged men with asthma from youth- a 20-year follow-up. *Respiratory Medicine*. 2011;105(6):950-5.
36. Krokstad S, Langhammer A, Hveem K, Holmen TL, Midthjell K, Stene TR, et al. Cohort Profile: The HUNT Study, Norway. *Int J Epidemiol*. 2013;42(4):968-77.

- 1  
2  
3 37. Mostad IL, Langaas M, Grill V. Central obesity is associated with lower intake of whole-grain  
4 bread and less frequent breakfast and lunch: results from the HUNT study, an adult all-population  
5 survey. *Applied Physiology, Nutrition, and Metabolism*. 2014;39(7):819-28.
- 6 38. Norwegian Institute of Public Health. The Oslo Health Study (HUBRO) [Article]. Oslo:  
7 Norwegian Institute of Public Health,; 2016 [updated 18.04.16. Available from:  
8 <https://www.fhi.no/en/studies/regional-health-studies/the-oslo-health-study-hubro/>.
- 9 39. Norwegian Directorate of Health (Helsedirektoratet). Anbefalinger om kosthold, ernæring og  
10 fysisk aktivitet (Norwegian guidelines on diet, nutrition and physical activity. 2014 (in Norwegian)  
11 Oslo: Helsedirektoratet; 2014 [cited 2017 10.05]. Available from:  
12 <https://helsedirektoratet.no/Lists/Publikasjoner/Attachments/806/Anbefalinger-om-kosthold-er-nering-og-fysisk-aktivitet-IS-2170.pdf>.
- 13 40. Handeland K, Kjelleveid M, Wik Markhus M, Eide Graff I, Froyland L, Lie O, et al. A Diet Score  
14 Assessing Norwegian Adolescents' Adherence to Dietary Recommendations-Development and Test-  
15 Retest Reproducibility of the Score. *Nutrients*. 2016;8(8).
- 16 41. Kurtze N, Rangul V, Hustvedt BE, Flanders WD. Reliability and validity of self-reported  
17 physical activity in the Nord-Trøndelag Health Study: HUNT 1. *Scand J Public Health*. 2008;36(1):52-  
18 61.
- 19 42. Ernstsén L, Rangul V, Nauman J, Nes BM, Dalen H, Krokstad S, et al. Protective Effect of  
20 Regular Physical Activity on Depression After Myocardial Infarction: The HUNT Study. *The American*  
21 *journal of medicine*. 2016;129(1):82-8.e1.
- 22 43. World Health Organization. BMI classification 2004 [updated 24.05.2017. Available from:  
23 [http://apps.who.int/bmi/index.jsp?introPage=intro\\_3.html](http://apps.who.int/bmi/index.jsp?introPage=intro_3.html).
- 24 44. International Labour Office. International Standard. Classification of Occupations. Structure,  
25 group definitions and correspondence tables. ISCO-08. Geneva2012.
- 26 45. Rothman KJ, Greenland S, Lash TL. *Modern epidemiology*2008.
- 27 46. Silvers KM, Scott KM. Fish consumption and self-reported physical and mental health status.  
28 *Public Health Nutr*. 2002;5(3):427-31.
- 29 47. Smith AP. The concept of well-being: relevance to nutrition research. *Br J Nutr*. 2005;93 Suppl  
30 1:S1-5.
- 31 48. Myint PK, Welch AA, Bingham SA, Surtees PG, Wainwright NW, Luben RN, et al. Fruit and  
32 vegetable consumption and self-reported functional health in men and women in the European  
33 Prospective Investigation into Cancer-Norfolk (EPIC-Norfolk): a population-based cross-sectional  
34 study. *Public Health Nutr*. 2007;10(1):34-41.
- 35 49. Blank L, Grimsley M, Goyder E, Ellis E, Peters J. Community-based lifestyle interventions:  
36 changing behaviour and improving health. *Journal of Public Health*. 2007;29(3):236-45.
- 37 50. Munoz MA, Fito M, Marrugat J, Covas MI, Schroder H. Adherence to the Mediterranean diet  
38 is associated with better mental and physical health. *Br J Nutr*. 2009;101(12):1821-7.
- 39 51. Warburton DER, Nicol CW, Bredin SSD. Health benefits of physical activity: the evidence.  
40 *CMAJ : Canadian Medical Association Journal*. 2006;174(6):801-9.
- 41 52. Gill DL, Hammond CC, Reifsteck EJ, Jehu CM, Williams RA, Adams MM, et al. Physical Activity  
42 and Quality of Life. *Journal of Preventive Medicine and Public Health*. 2013;46(Suppl 1):S28-S34.
- 43 53. Bertheussen GF, Romundstad PR, Landmark T, Kaasa S, Dale O, Helbostad JL. Associations  
44 between physical activity and physical and mental health--a HUNT 3 study. *Med Sci Sports Exerc*.  
45 2011;43(7):1220-8.
- 46 54. Jakobsen MD, Sundstrup E, Brandt M, Jay K, Aagaard P, Andersen LL. Physical exercise at the  
47 workplace prevents deterioration of work ability among healthcare workers: cluster randomized  
48 controlled trial. *BMC Public Health*. 2015;15:1174.
- 49 55. Borak J. Obesity and the workplace. *Occupational Medicine*. 2011;61(4):220-2.
- 50 56. Yokota RTdC, Nusselder WJ, Robine J-M, Tafforeau J, Deboosere P, Van Oyen H. Contribution  
51 of Chronic Conditions to the Disability Burden across Smoking Categories in Middle-Aged Adults,  
52 Belgium. *PLoS ONE*. 2016;11(4):e0153726.
- 53  
54  
55  
56  
57  
58  
59  
60

- 1  
2  
3 57. Mosdol A. Dietary assessment - the weakest link?: a dissertation exploring the limitations to  
4 questionnaire based methods of dietary assessment. [Ph.D]. Oslo: University of Oslo; 2004.  
5 58. de Croon EM, Sluiter JK, Nijssen TF, Kammeijer M, Dijkmans BA, Lankhorst GJ, et al. Work  
6 ability of Dutch employees with rheumatoid arthritis. *Scandinavian journal of rheumatology*.  
7 2005;34(4):277-83.  
8 59. Sluiter JK, Frings-Dresen MH. Quality of life and illness perception in working and sick-listed  
9 chronic RSI patients. *Int Arch Occup Environ Health*. 2008;81(4):495-501.  
10 60. Pohjonen T. Perceived work ability of home care workers in relation to individual and work-  
11 related factors in different age groups. *Occupational Medicine-Oxford*. 2001;51(3):209-17.  
12 61. Koolhaas W, van der Klink JLL, de Boer MR, Groothoff JW, Brouwer S. Chronic health  
13 conditions and work ability in the ageing workforce: the impact of work conditions, psychosocial  
14 factors and perceived health. *International Archives of Occupational and Environmental Health*.  
15 2014;87(4):433-43.  
16 62. Kjollesdal MR, Holmboe-Ottesen G, Mosdol A, Wandel M. The relative importance of  
17 socioeconomic indicators in explaining differences in BMI and waist:hip ratio, and the mediating  
18 effect of work control, dietary patterns and physical activity. *Br J Nutr*. 2010;104(8):1230-40.  
19 63. Norwegian Institute of Public Health. Overweight and obesity in Norway [Fact Sheet].  
20 Norwegian Institute of Public Health; 2011 [updated 03.11.17. Available from:  
21 [https://www.fhi.no/en/op/public-health-report-2014/risk--protective-factors/overweight-and-](https://www.fhi.no/en/op/public-health-report-2014/risk--protective-factors/overweight-and-obesity-in-norway---/#overweight-and-obesity-in-adults)  
22 [obesity-in-norway---/#overweight-and-obesity-in-adults](https://www.fhi.no/en/op/public-health-report-2014/risk--protective-factors/overweight-and-obesity-in-norway---/#overweight-and-obesity-in-adults).  
23  
24 64. Soulakova JN, Hartman AM, Liu B, Willis GB, Augustine S. Reliability of adult self-reported  
25 smoking history: data from the tobacco use supplement to the current population survey 2002-2003  
26 cohort. *Nicotine & tobacco research : official journal of the Society for Research on Nicotine and*  
27 *Tobacco*. 2012;14(8):952-60.  
28 65. Heffner JL, Kealey KA, Marek PM, Bricker JB, Ludman EJ, Peterson AV, Jr. Proactive telephone  
29 counseling for adolescent smokers: Comparing regular smokers with infrequent and occasional  
30 smokers on treatment receptivity, engagement, and outcomes. *Drug and alcohol dependence*.  
31 2016;165:229-35.  
32  
33  
34  
35  
36  
37  
38  
39  
40  
41  
42  
43  
44  
45  
46  
47  
48  
49  
50  
51  
52  
53  
54  
55  
56  
57  
58  
59  
60

**STROBE 2007 (v4) Statement—Checklist of items that should be included in reports of *cross-sectional studies***

| Section/Topic                | Item # | Recommendation                                                                                                                                                                       | Reported on page #                |
|------------------------------|--------|--------------------------------------------------------------------------------------------------------------------------------------------------------------------------------------|-----------------------------------|
| Title and abstract           | 1      | (a) Indicate the study's design with a commonly used term in the title or the abstract                                                                                               | 0                                 |
|                              |        | (b) Provide in the abstract an informative and balanced summary of what was done and what was found                                                                                  | 1                                 |
| <b>Introduction</b>          |        |                                                                                                                                                                                      |                                   |
| Background/rationale         | 2      | Explain the scientific background and rationale for the investigation being reported                                                                                                 | 3-4                               |
| Objectives                   | 3      | State specific objectives, including any prespecified hypotheses                                                                                                                     | 4                                 |
| <b>Methods</b>               |        |                                                                                                                                                                                      |                                   |
| Study design                 | 4      | Present key elements of study design early in the paper                                                                                                                              | 4                                 |
| Setting                      | 5      | Describe the setting, locations, and relevant dates, including periods of recruitment, exposure, follow-up, and data collection                                                      | 4                                 |
| Participants                 | 6      | (a) Give the eligibility criteria, and the sources and methods of selection of participants                                                                                          | 4                                 |
| Variables                    | 7      | Clearly define all outcomes, exposures, predictors, potential confounders, and effect modifiers. Give diagnostic criteria, if applicable                                             | 5-7                               |
| Data sources/<br>measurement | 8*     | For each variable of interest, give sources of data and details of methods of assessment (measurement). Describe comparability of assessment methods if there is more than one group | 5-7                               |
| Bias                         | 9      | Describe any efforts to address potential sources of bias                                                                                                                            | 16                                |
| Study size                   | 10     | Explain how the study size was arrived at                                                                                                                                            | 8                                 |
| Quantitative variables       | 11     | Explain how quantitative variables were handled in the analyses. If applicable, describe which groupings were chosen and why                                                         | 5-7                               |
| Statistical methods          | 12     | (a) Describe all statistical methods, including those used to control for confounding                                                                                                | 7                                 |
|                              |        | (b) Describe any methods used to examine subgroups and interactions                                                                                                                  | 7                                 |
|                              |        | (c) Explain how missing data were addressed                                                                                                                                          | 4 and 8                           |
|                              |        | (d) If applicable, describe analytical methods taking account of sampling strategy                                                                                                   | 12 (multiple logistic regression) |
|                              |        | (e) Describe any sensitivity analyses                                                                                                                                                |                                   |

|                          |     |                                                                                                                                                                                                                                                                                                                                                                                                               |                                                     |
|--------------------------|-----|---------------------------------------------------------------------------------------------------------------------------------------------------------------------------------------------------------------------------------------------------------------------------------------------------------------------------------------------------------------------------------------------------------------|-----------------------------------------------------|
| <b>Results</b>           |     |                                                                                                                                                                                                                                                                                                                                                                                                               |                                                     |
| Participants             | 13* | (a) Report numbers of individuals at each stage of study—eg numbers potentially eligible, examined for eligibility, confirmed eligible, included in the study, completing follow-up, and analysed<br>(b) Give reasons for non-participation at each stage<br>(c) Consider use of a flow diagram                                                                                                               | 4                                                   |
| Descriptive data         | 14* | (a) Give characteristics of study participants (eg demographic, clinical, social) and information on exposures and potential confounders<br>(b) Indicate number of participants with missing data for each variable of interest                                                                                                                                                                               | Table 1 (page 9)<br>Table 1 (page 9)                |
| Outcome data             | 15* | Report numbers of outcome events or summary measures                                                                                                                                                                                                                                                                                                                                                          | Table 2 (page 10)                                   |
| Main results             | 16  | (a) Give unadjusted estimates and, if applicable, confounder-adjusted estimates and their precision (eg, 95% confidence interval). Make clear which confounders were adjusted for and why they were included<br>(b) Report category boundaries when continuous variables were categorized<br>(c) If relevant, consider translating estimates of relative risk into absolute risk for a meaningful time period | Table 3 (page 11)<br>Table 2 (page 10),<br>page 5-7 |
| Other analyses           | 17  | Report other analyses done—eg analyses of subgroups and interactions, and sensitivity analyses                                                                                                                                                                                                                                                                                                                | 7 (PAF)                                             |
| <b>Discussion</b>        |     |                                                                                                                                                                                                                                                                                                                                                                                                               |                                                     |
| Key results              | 18  | Summarise key results with reference to study objectives                                                                                                                                                                                                                                                                                                                                                      | 12                                                  |
| Limitations              | 19  | Discuss limitations of the study, taking into account sources of potential bias or imprecision. Discuss both direction and magnitude of any potential bias                                                                                                                                                                                                                                                    | 15-16                                               |
| Interpretation           | 20  | Give a cautious overall interpretation of results considering objectives, limitations, multiplicity of analyses, results from similar studies, and other relevant evidence                                                                                                                                                                                                                                    | 13-15                                               |
| Generalisability         | 21  | Discuss the generalisability (external validity) of the study results                                                                                                                                                                                                                                                                                                                                         | 16                                                  |
| <b>Other information</b> |     |                                                                                                                                                                                                                                                                                                                                                                                                               |                                                     |
| Funding                  | 22  | Give the source of funding and the role of the funders for the present study and, if applicable, for the original study on which the present article is based                                                                                                                                                                                                                                                 | Footnotes page 18                                   |

\*Give information separately for cases and controls in case-control studies and, if applicable, for exposed and unexposed groups in cohort and cross-sectional studies.

**Note:** An Explanation and Elaboration article discusses each checklist item and gives methodological background and published examples of transparent reporting. The STROBE checklist is best used in conjunction with this article (freely available on the Web sites of PLoS Medicine at <http://www.plosmedicine.org/>, Annals of Internal Medicine at <http://www.annals.org/>, and Epidemiology at <http://www.epidem.com/>). Information on the STROBE Initiative is available at [www.strobe-statement.org](http://www.strobe-statement.org).

1  
2  
3  
4  
5  
6  
7  
8  
9  
10  
11  
12  
13  
14  
15  
16  
17  
18  
19  
20  
21  
22  
23  
24  
25  
26  
27  
28  
29  
30  
31  
32  
33  
34  
35  
36  
37  
38  
39  
40  
41  
42  
43  
44  
45  
46

For peer review only
